# Supplementary material for: Catalytic role of iron-superoxide dismutase in hydrogen abstraction by super oxide radical anion from ascorbic acid
Source: Royal Society of Chemistry journal article supplement (doi:10.1039/c6ra11455e), 2016-01-01
Supplement: c6ra11455e1.pdf [file c6ra11455e1.pdf]

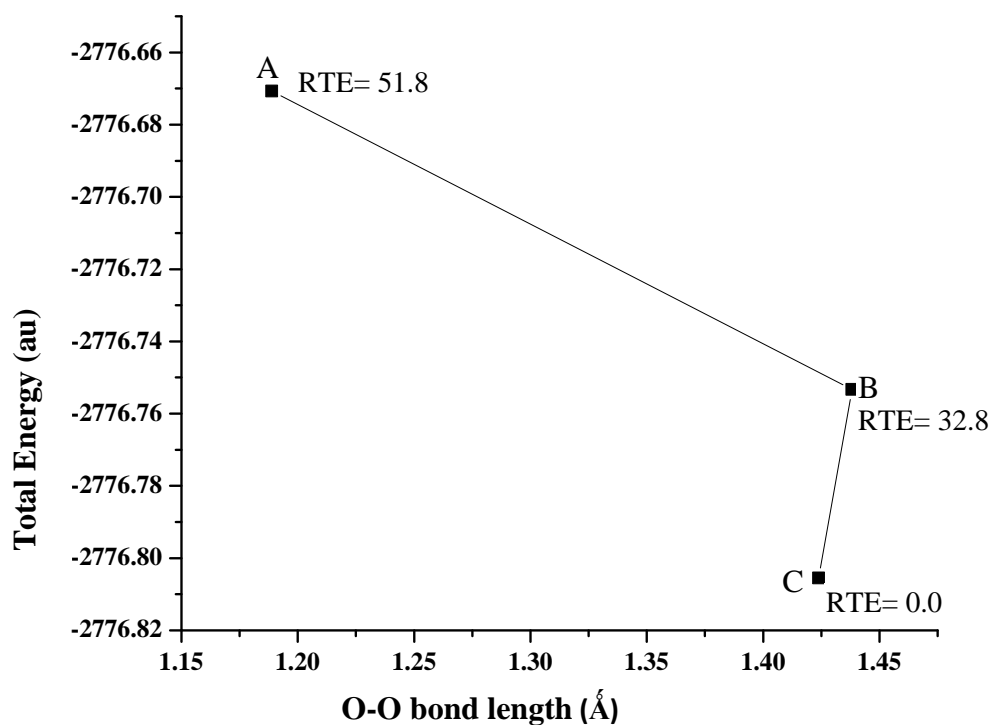

Fig. S1. Variation of total energy (a.u.) as a function of OO bond distance of superoxide radical anion moiety during the process of hydrogen abstraction from the (O3O4) sites of ascorbic acid. Relative total energies (RTE) are in kcal/mol. The point A corresponds to total energy of free reactants while the point C corresponds to the final product complex. The point B was obtained during search for transition state which was found not to exist. Thus the point B does not represent the optimized TS and its location does not follow any physical criterion e.g. that of minimum energy or one based on interatomic distances. All calculations were performed at the M06-2X/6-311+G(d) level of theory in gas phase.

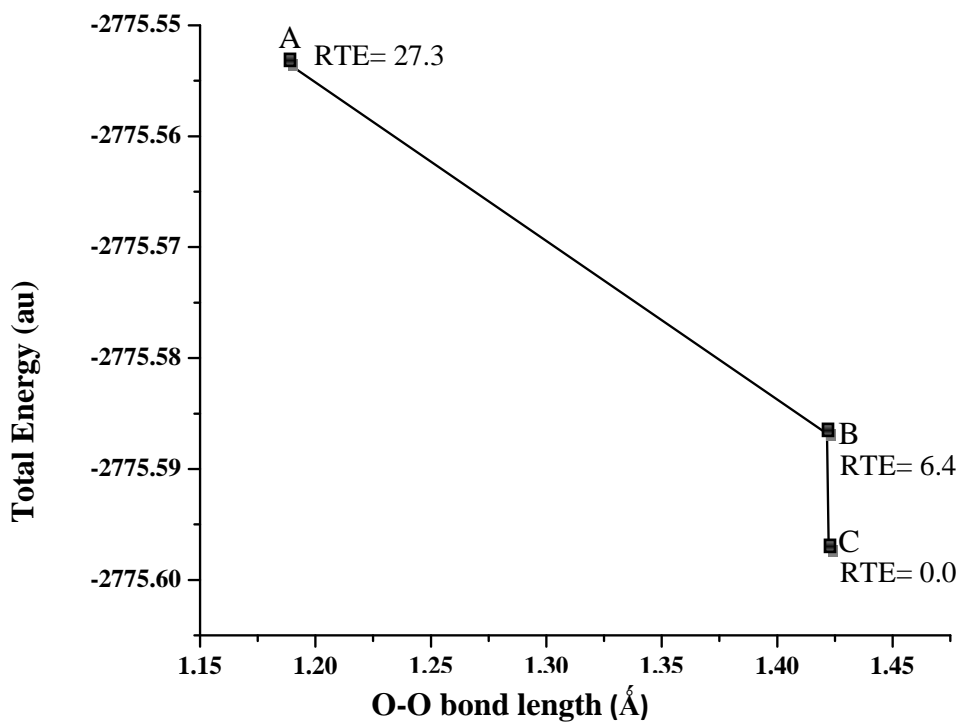

Fig. S2. Variation of total energy (a.u.) as a function of OO bond distance of superoxide radical anion moiety during the process of hydrogen abstraction from the (O6O7) site of ascorbic acid. Relative total energies (RTE) are in kcal/mol. The point A corresponds to total energy of free reactants while the point C corresponds to the final product complex. The point B was obtained during search for transition state which was found not to exist. Thus the point B does not represent the optimized TS and its location does not follow any physical criterion e.g. that of minimum energy or one based on interatomic distances. All calculations were performed at the M06-2X/6-311+G(d) level of theory in gas phase.

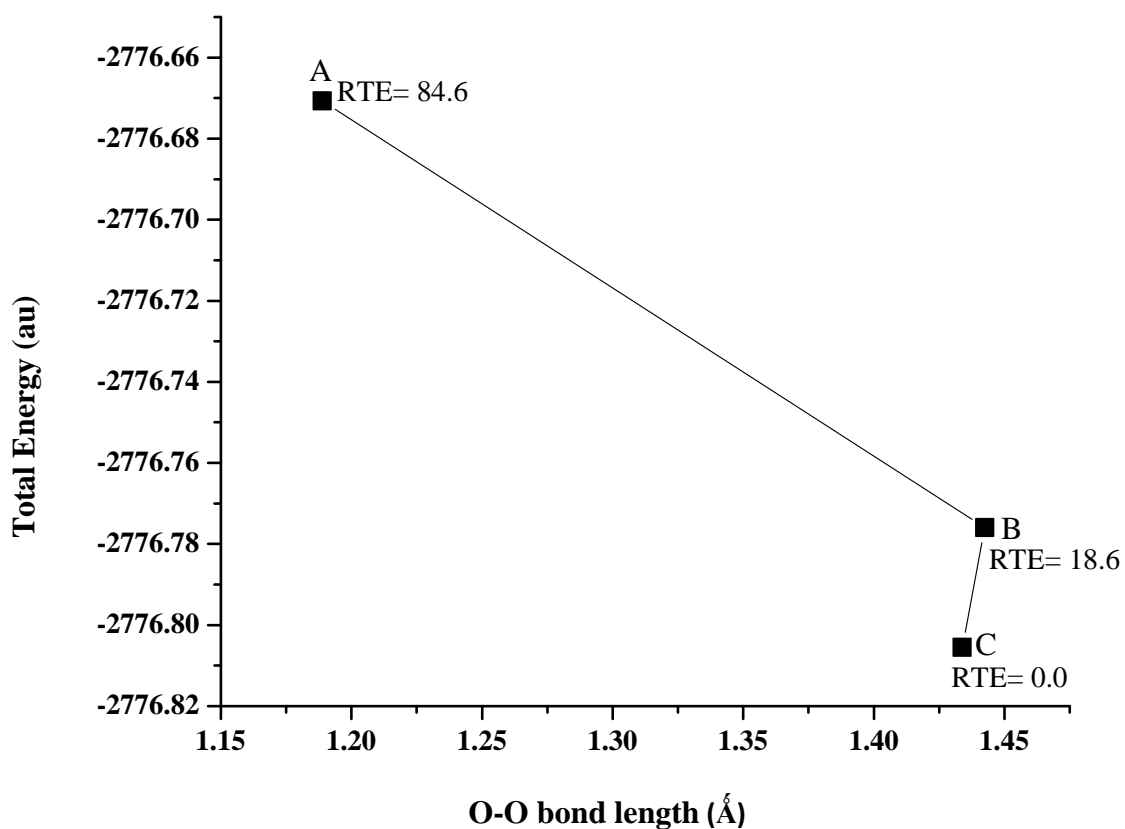

Fig. S3. Variation of total energy (a.u.) as a function of OO bond distance of superoxide radical anion moiety during the process of hydrogen abstraction from the (C6C7) site of ascorbic acid. Relative total energies (RTE) are in kcal/mol. The point A corresponds to total energy of free reactants while the point C corresponds to the final product complex. The point B was obtained during search for transition state which was found to exist with a negative barrier energy. All calculations were performed at the M06-2X/6-311+G(d) level of theory in gas phase.

Table S4. NBO charge distribution in ascorbic acid obtained at M06-2X/6-311+G(d) level of theory in aqueous media.<sup>a</sup>

| Sl. No. | Atoms | NBO Charge | Total                                   |
|---------|-------|------------|-----------------------------------------|
| 1       | O1    | -0.568     | Total positive<br>NBO charge=<br>4.151  |
| 2       | C2    | 0.784      |                                         |
| 3       | O2    | -0.644     |                                         |
| 4       | C3    | 0.104      |                                         |
| 5       | O3    | -0.693     | Total negative<br>NBO charge=<br>-4.150 |
| 6       | H3    | 0.504      |                                         |
| 7       | C4    | 0.312      |                                         |
| 8       | O4    | -0.673     |                                         |
| 9       | H4    | 0.510      | Net<br>charge=0.001                     |
| 10      | C5    | 0.075      |                                         |
| 11      | H5'   | 0.236      |                                         |
| 12      | C6    | 0.078      |                                         |
| 13      | H6'   | 0.205      |                                         |
| 14      | O6    | -0.773     |                                         |
| 15      | H6    | 0.489      |                                         |
| 16      | C7    | -0.043     |                                         |
| 17      | H7'   | 0.195      |                                         |
| 18      | H7''  | 0.179      |                                         |
| 19      | O7    | -0.756     |                                         |
| 20      | H7    | 0.478      |                                         |

<sup>a</sup>The optimized structure of ascorbic acid is shown in Fig. 1.

Table S5. NBO charge distribution in Fe-SOD model complexed with super oxide anion obtained at M06-2X/6-11+G(d) level of theory in aqueous media.

| Sl. No. | Atoms | NBO Charge | Total                                               | S. No.                                               | Atoms    | NBO Charge | Total                                                |
|---------|-------|------------|-----------------------------------------------------|------------------------------------------------------|----------|------------|------------------------------------------------------|
| 1       | Fe10  | 1.156      | 1.156                                               | 19                                                   | H19      | 0.247      |                                                      |
| 2       | O8    | 0.023      | O <sub>2</sub> <sup>-</sup><br>:0.115               | 20                                                   | C20      | -0.064     |                                                      |
| 3       | O9    | 0.092      |                                                     | 21                                                   | H20      | 0.235      |                                                      |
| 4       | N11   | -0.586     | Ring 1:<br>Charge=<br>(-1.19)+<br>(1.439)=<br>0.249 | 22                                                   | N21      | -0.589     | Ring 3:<br>Charge=<br>(-1.200)+<br>(1.445)=<br>0.245 |
| 5       | C12   | 0.262      |                                                     | 23                                                   | C22      | 0.263      |                                                      |
| 6       | H12   | 0.235      |                                                     | 24                                                   | H22      | 0.240      |                                                      |
| 7       | N13   | -0.508     |                                                     | 25                                                   | N23      | -0.509     |                                                      |
| 8       | H13   | 0.457      |                                                     | 26                                                   | H23      | 0.456      |                                                      |
| 9       | C14   | -0.040     |                                                     | 27                                                   | C24      | -0.039     |                                                      |
| 10      | H14   | 0.249      |                                                     | 28                                                   | H24      | 0.248      |                                                      |
| 11      | C15   | -0.056     |                                                     | 29                                                   | C25      | -0.063     |                                                      |
| 12      | H15   | 0.236      |                                                     | 30                                                   | H25      | 0.238      |                                                      |
| 13      | N16   | -0.596     |                                                     | Ring 2:<br>Charge=<br>(-1.213)+<br>(1.446)=<br>0.233 |          |            |                                                      |
| 14      | C17   | 0.272      | Total                                               |                                                      | Negative | -3.603     |                                                      |
| 15      | H17   | 0.237      |                                                     |                                                      | Positive | 5.601      |                                                      |
| 16      | N18   | -0.510     |                                                     |                                                      | Net      | 1.998      |                                                      |
| 17      | H18   | 0.455      |                                                     |                                                      |          |            |                                                      |
| 18      | C19   | -0.043     |                                                     |                                                      |          |            |                                                      |

Table S6. NBO charge distribution on different atoms of TS2 in presence of Fe-SOD involving double hydrogen abstraction by superoxide radical anion from the O6 and C6 sites to form product complex PC2 in aqueous media at M06-2X/6-311+G(d) level.<sup>a</sup>

| Sl. No. | Atoms | NBO Charge | Total                                                      | S. No. | Atoms  | NBO Charge       | Total                                          |
|---------|-------|------------|------------------------------------------------------------|--------|--------|------------------|------------------------------------------------|
| 1       | O1    | -0.561     | Ascorbic acid<br>Charge=<br>(-3.925)+<br>(4.085)<br>=0.150 | 27     | N13    | -0.515           | Ring1<br>Charge=<br>(-1.243)+<br>(1.430)=0.187 |
| 2       | C2    | 0.793      |                                                            | 28     | H13    | 0.455            |                                                |
| 3       | O2    | -0.590     |                                                            | 29     | C14    | -0.051           |                                                |
| 4       | C3    | 0.129      |                                                            | 30     | H14    | 0.246            |                                                |
| 5       | O3    | -0.683     |                                                            | 31     | C15    | -0.060           |                                                |
| 6       | H3    | 0.511      |                                                            | 32     | H15    | 0.235            |                                                |
| 7       | C4    | 0.304      |                                                            | 33     | N16    | -0.602           | Ring2<br>Charge=<br>(-1.228)+<br>(1.436)=0.208 |
| 8       | O4    | -0.662     |                                                            | 34     | C17    | 0.261            |                                                |
| 9       | H4    | 0.510      |                                                            | 35     | H17    | 0.239            |                                                |
| 10      | C5    | -0.003     |                                                            | 36     | N18    | -0.515           |                                                |
| 11      | H5'   | 0.266      |                                                            | 37     | H18    | 0.454            |                                                |
| 12      | C6    | 0.628      |                                                            | 38     | C19    | -0.050           |                                                |
| 13      | O6    | -0.598     |                                                            | 39     | H19    | 0.246            | Ring3<br>Charge=<br>(-1.264)+<br>(1.448)=0.184 |
| 14      | C7    | -0.115     |                                                            | 40     | C20    | -0.061           |                                                |
| 15      | O7    | -0.723     |                                                            | 41     | H20    | 0.236            |                                                |
| 16      | H7    | 0.494      |                                                            | 42     | N21    | -0.624           |                                                |
| 17      | H7'   | 0.228      |                                                            | 43     | C22    | 0.281            |                                                |
| 18      | H7''  | 0.222      |                                                            | 44     | H22    | 0.238            |                                                |
| 19      | O8    | -0.526     | 45                                                         | N23    | -0.520 | Net Charge=2.002 |                                                |
| 20      | H6    | 0.504      | 46                                                         | H23    | 0.452  |                  |                                                |
| 21      | O9    | -0.448     | 47                                                         | C24    | -0.055 |                  |                                                |
| 22      | H6'   | 0.442      | 48                                                         | H24    | 0.244  |                  |                                                |
| 23      | Fe10  | 1.301      | 49                                                         | C25    | -0.065 |                  |                                                |
| 24      | N11   | -0.617     | 50                                                         | H25    | 0.233  |                  |                                                |
| 25      | C12   | 0.265      |                                                            |        |        |                  |                                                |
| 26      | H12   | 0.229      |                                                            |        |        |                  |                                                |

<sup>a</sup>The optimized structure of TS2 is shown in Fig. 4.

Table S7. NBO charge distribution on different atoms of TS3 in presence of Fe-SOD involving double hydrogen abstraction by superoxide radical anion from the C5 and C6 sites to form product complex PC3 in aqueous media at M06-2X/6-311+G(d) level.<sup>a</sup>

| S. No | Atoms | NBO Charge | Total                                                      | S. No | Atoms  | NBO Charge | Total                                          |
|-------|-------|------------|------------------------------------------------------------|-------|--------|------------|------------------------------------------------|
| 1     | O1    | -0.521     | Ascorbic acid<br>Charge:<br>(-3.782)+<br>(4.395)=<br>0.613 | 27    | N13    | -0.522     | Ring1<br>Charge=<br>(-1.208)+<br>(1.427)=0.219 |
| 2     | C2    | 0.797      |                                                            | 28    | H13    | 0.450      |                                                |
| 3     | O2    | -0.465     |                                                            | 29    | C14    | -0.052     |                                                |
| 4     | C3    | 0.267      |                                                            | 30    | H14    | 0.242      | Ring2<br>Charge=<br>(-1.195)+<br>(1.414)=0.219 |
| 5     | O3    | -0.622     |                                                            | 31    | C15    | -0.071     |                                                |
| 6     | H3    | 0.523      |                                                            | 32    | H15    | 0.229      |                                                |
| 7     | C4    | 0.200      |                                                            | 33    | N16    | -0.549     |                                                |
| 8     | O4    | -0.666     |                                                            | 34    | C17    | 0.255      |                                                |
| 9     | H4    | 0.526      |                                                            | 35    | H17    | 0.230      |                                                |
| 10    | C5    | 0.619      |                                                            | 36    | N18    | -0.519     |                                                |
| 11    | C6    | -0.051     |                                                            | 37    | H18    | 0.451      |                                                |
| 12    | O6    | -0.726     |                                                            | 38    | C19    | -0.048     |                                                |
| 13    | H6    | 0.499      |                                                            | 39    | H19    | 0.243      |                                                |
| 14    | C7    | -0.024     |                                                            | 40    | C20    | -0.079     |                                                |
| 15    | O7    | -0.707     |                                                            | 41    | H20    | 0.235      |                                                |
| 16    | H7    | 0.517      |                                                            | 42    | N21    | -0.563     | Ring3<br>Charge=<br>(-1.204)+<br>(1.426)=0.222 |
| 17    | H7'   | 0.226      |                                                            | 43    | C22    | 0.263      |                                                |
| 18    | H7''  | 0.221      |                                                            | 44    | H22    | 0.241      |                                                |
| 19    | O8    | -0.480     | 45                                                         | N23   | -0.519 |            |                                                |
| 20    | H5'   | 0.492      | 46                                                         | H23   | 0.450  |            |                                                |
| 21    | O9    | -0.548     | 47                                                         | C24   | -0.052 |            |                                                |
| 22    | H6'   | 0.333      | 48                                                         | H24   | 0.242  |            |                                                |
| 23    | Fe10  | 0.921      | 0.921                                                      | 49    | C25    | -0.070     | Net charge=1.991                               |
| 24    | N11   | -0.563     |                                                            | 50    | H25    | 0.230      |                                                |
| 25    | C12   | 0.267      |                                                            |       |        |            |                                                |
| 26    | H12   | 0.239      |                                                            |       |        |            |                                                |

<sup>a</sup>The optimized structure of TS3 is shown in Fig. 4.

Table S8. NBO charge distribution on different atoms of TS5 in presence of Fe-SOD involving double hydrogen abstraction by superoxide radical anion from the C6 and C7 sites to form product complex PC5 in aqueous media at M06-2X/6-311+G(d) level.<sup>a</sup>

| S. No. | Atoms | NBO Charge | Total                                                      | S. No. | Atoms  | NBO Charge | Total                                              |
|--------|-------|------------|------------------------------------------------------------|--------|--------|------------|----------------------------------------------------|
| 1      | O1    | -0.559     | Ascorbic acid<br>Charge=<br>(-4.085)<br>+(4.476)<br>=0.391 | 27     | N13    | -0.522     | Ring1<br>Charge=<br>(-1.208)+<br>(1.427)=<br>0.219 |
| 2      | C2    | 0.789      |                                                            | 28     | H13    | 0.450      |                                                    |
| 3      | O2    | -0.628     |                                                            | 29     | C14    | -0.052     |                                                    |
| 4      | C3    | 0.113      |                                                            | 30     | H14    | 0.242      |                                                    |
| 5      | O3    | -0.684     |                                                            | 31     | C15    | -0.071     |                                                    |
| 6      | H3    | 0.510      |                                                            | 32     | H15    | 0.229      |                                                    |
| 7      | C4    | 0.341      |                                                            | 33     | N16    | -0.549     | Ring2<br>Charge=<br>(-1.195)+<br>(1.414)=<br>0.219 |
| 8      | O4    | -0.657     |                                                            | 34     | C17    | 0.255      |                                                    |
| 9      | H4    | 0.517      |                                                            | 35     | H17    | 0.230      |                                                    |
| 10     | C5    | 0.027      |                                                            | 36     | N18    | -0.519     |                                                    |
| 11     | H5'   | 0.279      |                                                            | 37     | H18    | 0.451      |                                                    |
| 12     | C6    | 0.581      |                                                            | 38     | C19    | -0.048     |                                                    |
| 13     | O6    | -0.598     |                                                            | 39     | H19    | 0.243      |                                                    |
| 14     | H6    | 0.538      |                                                            | 40     | C20    | -0.079     |                                                    |
| 15     | C7    | -0.209     |                                                            | 41     | H20    | 0.235      |                                                    |
| 16     | O7    | -0.750     |                                                            | 42     | N21    | -0.563     | Ring3<br>Charge=<br>(-1.204)+<br>(1.426)<br>=0.222 |
| 17     | H7    | 0.512      |                                                            | 43     | C22    | 0.263      |                                                    |
| 18     | H7''  | 0.269      |                                                            | 44     | H22    | 0.241      |                                                    |
| 19     | O8    | -0.462     |                                                            | 45     | N23    | -0.519     |                                                    |
| 20     | H6'   | 0.504      | 46                                                         | H23    | 0.450  |            |                                                    |
| 21     | O9    | -0.500     | 47                                                         | C24    | -0.052 |            |                                                    |
| 22     | H7'   | 0.405      | 48                                                         | H24    | 0.242  |            |                                                    |
| 23     | Fe10  | 1.006      | 49                                                         | C25    | -0.070 |            |                                                    |
| 24     | N11   | -0.563     | 50                                                         | H25    | 0.230  |            |                                                    |
| 25     | C12   | 0.267      | Net Charge=2.005                                           |        |        |            |                                                    |
| 26     | H12   | 0.239      |                                                            |        |        |            |                                                    |

<sup>a</sup>The optimized structure of TS5 is shown in Fig. 5.



Table S9. NBO charge distribution on different atoms of TS6 in presence of Fe-SOD involving double hydrogen abstraction by superoxide radical anion from the C7 and O7 sites to form product complex PC6 in aqueous media at M06-2X/6-311+G(d) level.<sup>a</sup>

| S. No. | Atoms | NBO Charge | Total                                          | S. No. | Atoms  | NBO Charge | Total                                   |
|--------|-------|------------|------------------------------------------------|--------|--------|------------|-----------------------------------------|
| 1      | O1    | -0.561     | Ascorbic acid<br>Charge=(-3.830)+(4.028)=0.198 | 27     | N13    | -0.519     | Ring 1<br>Charge=(-0.208)+(1.420)=0.212 |
| 2      | C2    | 0.789      |                                                | 28     | H13    | 0.451      |                                         |
| 3      | O2    | -0.616     |                                                | 29     | C14    | -0.053     |                                         |
| 4      | C3    | 0.114      |                                                | 30     | H14    | 0.243      |                                         |
| 5      | O3    | -0.686     |                                                | 31     | C15    | -0.061     |                                         |
| 6      | H3    | 0.508      |                                                | 32     | H15    | 0.231      |                                         |
| 7      | C4    | 0.306      |                                                | 33     | N16    | -0.567     | Ring 2<br>Charge=(-1.187)+(1.427)=0.240 |
| 8      | O4    | -0.674     |                                                | 34     | C17    | 0.261      |                                         |
| 9      | H4    | 0.515      |                                                | 35     | H17    | 0.236      |                                         |
| 10     | C5    | 0.083      |                                                | 36     | N18    | -0.516     |                                         |
| 11     | H5'   | 0.241      |                                                | 37     | H18    | 0.453      |                                         |
| 12     | C6    | -0.000     |                                                | 38     | C19    | -0.051     |                                         |
| 13     | O6    | -0.737     |                                                | 39     | H19    | 0.245      | Ring 3<br>Charge=(-1.216)+(1.425)=0.209 |
| 14     | H6    | 0.509      |                                                | 40     | C20    | -0.053     |                                         |
| 15     | H6'   | 0.243      |                                                | 41     | H20    | 0.232      |                                         |
| 16     | C7    | 0.518      |                                                | 42     | N21    | -0.580     |                                         |
| 17     | O7    | -0.556     |                                                | 43     | C22    | 0.261      |                                         |
| 18     | H7''  | 0.202      |                                                | 44     | H22    | 0.233      |                                         |
| 19     | O8    | -0.444     | Charge=(-0.930)+(1.020)=0.090                  | 45     | N23    | -0.518     | Net charge=2.003                        |
| 20     | H7'   | 0.498      | 46                                             | H23    | 0.453  |            |                                         |
| 21     | O9    | -0.486     | 47                                             | C24    | -0.050 |            |                                         |
| 22     | H7    | 0.522      | 48                                             | H24    | 0.245  |            |                                         |
| 23     | Fe10  | 1.054      | 1.054                                          | 49     | C25    | -0.068     |                                         |
| 24     | N11   | -0.575     |                                                | 50     | H25    | 0.233      |                                         |
| 25     | C12   | 0.259      |                                                |        |        |            |                                         |
| 26     | H12   | 0.236      |                                                |        |        |            |                                         |

<sup>a</sup>The optimized structure of TS6 is shown in Fig. 5.

Table S10. NBO charge distribution on different atoms of product complex PC1 in presence of Fe-SOD involving double hydrogen abstraction by superoxide radical anion from the O3 and O4 sites of ascorbic acid in aqueous media at M06-2X/6-311+G(d) level.<sup>a</sup>

| S. No. | Atoms | NBO Charge | Total                                                                      | S. No.           | Atoms  | NBO Charge                                                    | Total                                                          |
|--------|-------|------------|----------------------------------------------------------------------------|------------------|--------|---------------------------------------------------------------|----------------------------------------------------------------|
| 1      | O1    | -0.542     | Ascorbic acid<br>Charge=<br>(-3.655)+<br>(3.707)=<br>0.052                 | 27               | N13    | -0.503                                                        | Charge=<br>(-1.180)+<br>(1.414)<br>=0.234                      |
| 2      | C2    | 0.732      |                                                                            | 28               | H13    | 0.448                                                         |                                                                |
| 3      | O2    | -0.460     |                                                                            | 29               | C14    | -0.025                                                        |                                                                |
| 4      | C3    | 0.470      |                                                                            | 30               | H14    | 0.253                                                         |                                                                |
| 5      | O3    | -0.526     |                                                                            | 31               | C15    | -0.061                                                        |                                                                |
| 6      | C4    | 0.535      |                                                                            | 32               | H15    | 0.233                                                         | Ring 3:<br>Charge=<br>(-1.166)+<br>(1.424-<br>1.192)=<br>0.232 |
| 7      | O4    | -0.534     |                                                                            | 33               | N16    | -0.578                                                        |                                                                |
| 8      | C5    | 0.020      |                                                                            | 34               | C17    | 0.265                                                         |                                                                |
| 9      | H5'   | 0.258      |                                                                            | 35               | H17    | 0.229                                                         |                                                                |
| 10     | C6    | 0.095      |                                                                            | 36               | N18    | -0.503                                                        |                                                                |
| 11     | H6'   | 0.206      |                                                                            | 37               | H18    | 0.447                                                         |                                                                |
| 12     | O6    | -0.781     |                                                                            | 38               | C19    | -0.029                                                        |                                                                |
| 13     | H6    | 0.516      |                                                                            | 39               | H19    | 0.254                                                         |                                                                |
| 14     | C7    | -0.054     |                                                                            | 40               | C20    | -0.056                                                        |                                                                |
| 15     | O7    | -0.758     |                                                                            | 41               | H20    | 0.236                                                         |                                                                |
| 16     | H7    | 0.491      | 42                                                                         | N21              | -0.594 | Ring 3<br>Charge=<br>(-1.192)+<br>(1.424-<br>1.192)=<br>0.232 |                                                                |
| 17     | H7'   | 0.190      | 43                                                                         | C22              | 0.263  |                                                               |                                                                |
| 18     | H7''  | 0.194      | 44                                                                         | H22              | 0.227  |                                                               |                                                                |
| 19     | O8    | -0.418     | 45                                                                         | N23              | -0.510 |                                                               |                                                                |
| 20     | H3    | 0.533      | 46                                                                         | H23              | 0.447  |                                                               |                                                                |
| 21     | O9    | -0.421     | H <sub>2</sub> O <sub>2</sub><br>Charge=<br>(-0.839)<br>+(1.078)<br>=0.239 | 47               | C24    | -0.028                                                        |                                                                |
| 22     | H4    | 0.545      |                                                                            | 48               | H24    | 0.252                                                         |                                                                |
| 23     | Fe10  | 0.991      |                                                                            | 49               | C25    | -0.060                                                        |                                                                |
| 24     | N11   | -0.591     | Ring 1                                                                     | 50               | H25    | 0.235                                                         |                                                                |
| 25     | C12   | 0.249      |                                                                            | Net Charge=1.980 |        |                                                               |                                                                |
| 26     | H12   | 0.231      |                                                                            |                  |        |                                                               |                                                                |

<sup>a</sup>The optimized structure of PC1 is shown in Fig. 6.

Table S11. NBO charge distribution on different atoms of PC2 in presence of Fe-SOD involving double hydrogen abstraction by superoxide radical anion from the C6 and O6 sites of ascorbic acid in aqueous media at M06-2X/6-311+G(d) level.<sup>a</sup>

| S. No. | Atoms | NBO Charge | Total                                                      | S. No. | Atoms  | NBO Charge | Total                                              |
|--------|-------|------------|------------------------------------------------------------|--------|--------|------------|----------------------------------------------------|
| 1      | O1    | -0.571     | Ascorbic acid<br>Charge=<br>(-4.026)+<br>(4.073)=<br>0.047 | 27     | N13    | -0.515     | Ring1<br>Charge=<br>(-1.204)+<br>(1.418)<br>=0.214 |
| 2      | C2    | 0.793      |                                                            | 28     | H13    | 0.452      |                                                    |
| 3      | O2    | -0.598     |                                                            | 29     | C14    | -0.047     |                                                    |
| 4      | C3    | 0.127      |                                                            | 30     | H14    | 0.245      |                                                    |
| 5      | O3    | -0.685     |                                                            | 31     | C15    | -0.062     |                                                    |
| 6      | H3    | 0.510      |                                                            | 32     | H15    | 0.233      |                                                    |
| 7      | C4    | 0.304      |                                                            | 33     | N16    | -0.570     | Ring2<br>Charge=<br>(-1.193)+<br>(1.435)=<br>0.242 |
| 8      | O4    | -0.699     |                                                            | 34     | C17    | 0.269      |                                                    |
| 9      | H4    | 0.519      |                                                            | 35     | H17    | 0.233      |                                                    |
| 10     | C5    | 0.007      |                                                            | 36     | N18    | -0.513     |                                                    |
| 11     | H5'   | 0.261      |                                                            | 37     | H18    | 0.452      |                                                    |
| 12     | C6    | 0.626      |                                                            | 38     | C19    | -0.051     |                                                    |
| 13     | O6    | -0.603     |                                                            | 39     | H19    | 0.245      |                                                    |
| 14     | C7    | -0.127     |                                                            | 40     | C20    | -0.059     |                                                    |
| 15     | O7    | -0.743     |                                                            | 41     | H20    | 0.236      |                                                    |
| 16     | H7    | 0.491      |                                                            | 42     | N21    | -0.591     | Ring3<br>Chrage=<br>(-1.205)+<br>(1.419)=<br>0.214 |
| 17     | H7'   | 0.227      |                                                            | 43     | C22    | 0.261      |                                                    |
| 18     | H7''  | 0.211      |                                                            | 44     | H22    | 0.232      |                                                    |
| 19     | O8    | -0.424     | 45                                                         | N23    | -0.511 |            |                                                    |
| 20     | H6'   | 0.534      | 46                                                         | H23    | 0.452  |            |                                                    |
| 21     | O9    | -0.427     | 47                                                         | C24    | -0.028 |            |                                                    |
| 22     | H6    | 0.545      | 48                                                         | H24    | 0.242  |            |                                                    |
| 23     | Fe10  | 1.051      | 1.051                                                      | 49     | C25    | -0.075     | Net Charge=1.996                                   |
| 24     | N11   | -0.580     | 50                                                         | H25    | 0.232  |            |                                                    |
| 25     | C12   | 0.253      |                                                            |        |        |            |                                                    |
| 26     | H12   | 0.235      |                                                            |        |        |            |                                                    |

<sup>a</sup>The optimized structure of PC2 is shown in Fig. 6.

Table S12. NBO charge distribution on different atoms of PC3 in presence of Fe-SOD involving double hydrogen abstraction by superoxide radical anion from the C5 and C6 sites of ascorbic acid in aqueous media at M06-2X/6-311+G(d) level.<sup>a</sup>

| S. No. | Atoms | NBO Charge | Total                                                  | S. No. | Atoms  | NBO Charge       | Total                                              |
|--------|-------|------------|--------------------------------------------------------|--------|--------|------------------|----------------------------------------------------|
| 1      | O1    | -0.539     | Ascorbic acid<br>Charge=<br>(-3.972)+<br>(4.184)=0.212 | 27     | N13    | -0.512           | Ring1<br>Charge=<br>(-1.181)+<br>(1.424)=<br>0.243 |
| 2      | C2    | 0.770      |                                                        | 28     | H13    | 0.453            |                                                    |
| 3      | O2    | -0.612     |                                                        | 29     | C14    | -0.044           |                                                    |
| 4      | C3    | 0.144      |                                                        | 30     | H14    | 0.246            | Ring2<br>Charge=<br>(-1.155)+<br>(1.423)=<br>0.268 |
| 5      | O3    | -0.675     |                                                        | 31     | C15    | -0.060           |                                                    |
| 6      | H3    | 0.511      |                                                        | 32     | H15    | 0.235            |                                                    |
| 7      | C4    | 0.264      |                                                        | 33     | N16    | -0.531           |                                                    |
| 8      | O4    | -0.692     |                                                        | 34     | C17    | 0.262            |                                                    |
| 9      | H4    | 0.526      |                                                        | 35     | H17    | 0.234            |                                                    |
| 10     | C5    | 0.163      |                                                        | 36     | N18    | -0.515           | Ring3<br>Charge=<br>(-1.17)+<br>(1.411)=<br>0.241  |
| 11     | C6    | 0.302      |                                                        | 37     | H18    | 0.452            |                                                    |
| 12     | O6    | -0.696     |                                                        | 38     | C19    | -0.048           |                                                    |
| 13     | H6    | 0.522      | 39                                                     | H19    | 0.245  |                  |                                                    |
| 14     | C7    | -0.063     | 40                                                     | C20    | -0.061 |                  |                                                    |
| 15     | O7    | -0.695     | 41                                                     | H20    | 0.230  |                  |                                                    |
| 16     | H7    | 0.521      | 42                                                     | N21    | -0.561 | Net Charge=2.003 |                                                    |
| 17     | H7'   | 0.231      | 43                                                     | C22    | 0.235  |                  |                                                    |
| 18     | H7''  | 0.230      | 44                                                     | H22    | 0.233  |                  |                                                    |
| 19     | O8    | -0.383     | 45                                                     | N23    | -0.507 |                  |                                                    |
| 20     | H5'   | 0.514      | 46                                                     | H23    | 0.459  |                  |                                                    |
| 21     | O9    | -0.384     | 47                                                     | C24    | -0.034 |                  |                                                    |
| 22     | H6'   | 0.530      | 48                                                     | H24    | 0.247  |                  |                                                    |
| 23     | Fe10  | 0.762      | 0.762                                                  | 49     | C25    | -0.068           |                                                    |
| 24     | N11   | -0.565     |                                                        | 50     | H25    | 0.237            |                                                    |
| 25     | C12   | 0.246      |                                                        |        |        |                  |                                                    |
| 26     | H12   | 0.244      |                                                        |        |        |                  |                                                    |

<sup>a</sup>The optimized structure of PC3 is shown in Fig. 7.

Table S13. NBO charge distribution on different atoms of PC4 in presence of Fe-SOD involving double hydrogen abstraction by superoxide radical anion from the O6 and O7 sites of ascorbic acid in aqueous media at M06-2X/6-311+G(d) level.<sup>a</sup>

| S. No | Atoms | NBO Charge | Total                                                      | S. No | Atoms  | NBO Charge | Total                                              |
|-------|-------|------------|------------------------------------------------------------|-------|--------|------------|----------------------------------------------------|
| 1     | O1    | -0.533     | Ascorbic acid<br>Charge=<br>(-3.563)+<br>(3.629)=<br>0.066 | 27    | C14    | -0.049     | Ring2<br>Charge=<br>(-1.186)+<br>(1.431)=<br>0.245 |
| 2     | C2    | 0.792      |                                                            | 28    | H14    | 0.245      |                                                    |
| 3     | O2    | -0.599     |                                                            | 29    | C15    | -0.063     |                                                    |
| 4     | C3    | 0.123      |                                                            | 30    | H15    | 0.233      |                                                    |
| 5     | O3    | -0.681     |                                                            | 31    | N16    | -0.565     |                                                    |
| 6     | H3    | 0.508      |                                                            | 32    | C17    | 0.265      |                                                    |
| 7     | C4    | 0.303      |                                                            | 33    | H17    | 0.235      |                                                    |
| 8     | O4    | -0.680     |                                                            | 34    | N18    | -0.514     |                                                    |
| 9     | H4    | 0.520      |                                                            | 35    | H18    | 0.452      |                                                    |
| 10    | C5    | 0.006      |                                                            | 36    | C19    | -0.050     |                                                    |
| 11    | H5'   | 0.262      |                                                            | 37    | H19    | 0.245      |                                                    |
| 12    | C6    | 0.518      |                                                            | 38    | C20    | -0.057     |                                                    |
| 13    | O6    | -0.528     |                                                            | 39    | H20    | 0.234      |                                                    |
| 14    | C7    | 0.416      |                                                            | 40    | N21    | -0.580     |                                                    |
| 15    | O7    | -0.542     | 41                                                         | C22   | 0.263  |            |                                                    |
| 16    | H7''  | 0.181      | 42                                                         | H22   | 0.225  |            |                                                    |
| 17    | O8    | -0.421     | 43                                                         | N23   | -0.515 |            |                                                    |
| 18    | H6    | 0.536      | 44                                                         | H23   | 0.453  |            |                                                    |
| 19    | O9    | -0.427     | 45                                                         | C24   | -0.048 |            |                                                    |
| 20    | H7    | 0.536      | 46                                                         | H24   | 0.245  |            |                                                    |
| 21    | Fe10  | 1.055      | 47                                                         | C25   | -0.062 |            |                                                    |
| 22    | N11   | -0.586     | 1.055                                                      | 48    | H25    | 0.234      | Net Charge=2.019                                   |
| 23    | C12   | 0.263      | Ring1<br>Charge=<br>(-1.214)+<br>(1.428)=<br>0.214         |       |        |            |                                                    |
| 24    | H12   | 0.234      |                                                            |       |        |            |                                                    |
| 25    | N13   | -0.516     |                                                            |       |        |            |                                                    |
| 26    | H13   | 0.453      |                                                            |       |        |            |                                                    |

<sup>a</sup>The optimized structure of PC4 is shown in Fig. 7.

Table S14. NBO charge distribution on different atoms of PC5 in presence of Fe-SOD involving double hydrogen abstraction by superoxide radical anion from the C6 and C7 sites of ascorbic acid in aqueous media at M06-2X/6-311+G(d) level.<sup>a</sup>

| S. No. | Atoms | NBO Charge | Total                                                     | S. No. | Atoms  | NBO Charge | Total                                              |
|--------|-------|------------|-----------------------------------------------------------|--------|--------|------------|----------------------------------------------------|
| 1      | O1    | -0.571     | Ascorbic acid<br>Charge=<br>(-4.047)+<br>(4.13)<br>=0.083 | 27     | N13    | -0.526     | Ring1<br>Charge=<br>(-1.209)<br>(1.412)=<br>0.203  |
| 2      | C2    | 0.794      |                                                           | 28     | H13    | 0.463      |                                                    |
| 3      | O2    | -0.599     |                                                           | 29     | C14    | -0.047     |                                                    |
| 4      | C3    | 0.125      |                                                           | 30     | H14    | 0.245      | Ring2<br>Charge=<br>(-1.183)+<br>(1.43)=<br>0.247  |
| 5      | O3    | -0.697     |                                                           | 31     | C15    | -0.057     |                                                    |
| 6      | H3    | 0.516      |                                                           | 32     | H15    | 0.233      |                                                    |
| 7      | C4    | 0.303      |                                                           | 33     | N16    | -0.564     |                                                    |
| 8      | O4    | -0.718     |                                                           | 34     | C17    | 0.262      |                                                    |
| 9      | H4    | 0.530      |                                                           | 35     | H17    | 0.236      |                                                    |
| 10     | C5    | 0.056      |                                                           | 36     | N18    | -0.515     |                                                    |
| 11     | H5'   | 0.255      |                                                           | 37     | H18    | 0.453      |                                                    |
| 12     | C6    | 0.208      |                                                           | 38     | C19    | -0.051     |                                                    |
| 13     | O6    | -0.726     |                                                           | 39     | H19    | 0.245      |                                                    |
| 14     | H6    | 0.504      |                                                           | 40     | C20    | -0.053     |                                                    |
| 15     | C7    | 0.100      |                                                           | 41     | H20    | 0.234      |                                                    |
| 16     | O7    | -0.736     |                                                           | 42     | N21    | -0.582     | Ring3<br>Charge=<br>(-1.213)+<br>(1.433)=<br>0.220 |
| 17     | H7    | 0.517      |                                                           | 43     | C22    | 0.266      |                                                    |
| 18     | H7''  | 0.222      |                                                           | 44     | H22    | 0.234      |                                                    |
| 19     | O8    | -0.435     | 45                                                        | N23    | -0.516 |            |                                                    |
| 20     | H6'   | 0.541      | 46                                                        | H23    | 0.453  |            |                                                    |
| 21     | O9    | -0.424     | 47                                                        | C24    | -0.048 |            |                                                    |
| 22     | H7'   | 0.532      | 48                                                        | H24    | 0.246  |            |                                                    |
| 23     | Fe10  | 1.026      | 1.026                                                     | 49     | C25    | -0.067     | Net Charge=1.993                                   |
| 24     | N11   | -0.579     |                                                           | 50     | H25    | 0.234      |                                                    |
| 25     | C12   | 0.229      |                                                           |        |        |            |                                                    |
| 26     | H12   | 0.242      |                                                           |        |        |            |                                                    |

<sup>a</sup>The optimized structure of PC5 is shown in Fig. 8.

Table S15. NBO charge distribution on different atoms of PC6 in presence of Fe-SOD involving double hydrogen abstraction by superoxide radical anion from the C7 and O7 sites of ascorbic acid in aqueous media at M06-2X/6-311+G(d) level.<sup>a</sup>

| S. No. | Atoms | NBO Charge | Total                                                      | S. No.           | Atoms  | NBO Charge | Total                                              |
|--------|-------|------------|------------------------------------------------------------|------------------|--------|------------|----------------------------------------------------|
| 1      | O1    | -0.580     | Ascorbic Acid<br>Charge=<br>(-3.927)+<br>(3.980)<br>=0.052 | 27               | N13    | -0.518     | Ring1<br>Charge=<br>(-1.216)+<br>(1.431)=<br>0.215 |
| 2      | C2    | 0.795      |                                                            | 28               | H13    | 0.450      |                                                    |
| 3      | O2    | -0.625     |                                                            | 29               | C14    | -0.053     |                                                    |
| 4      | C3    | 0.107      |                                                            | 30               | H14    | 0.243      |                                                    |
| 5      | O3    | -0.695     |                                                            | 31               | C15    | -0.061     |                                                    |
| 6      | H3    | 0.506      |                                                            | 32               | H15    | 0.232      |                                                    |
| 7      | C4    | 0.323      |                                                            | 33               | N16    | -0.567     | Ring2<br>Charge=<br>(-1.193)<br>+(1.431)<br>=0.238 |
| 8      | O4    | -0.667     |                                                            | 34               | C17    | 0.265      |                                                    |
| 9      | H4    | 0.515      |                                                            | 35               | H17    | 0.235      |                                                    |
| 10     | C5    | 0.076      |                                                            | 36               | N18    | -0.514     |                                                    |
| 11     | H5'   | 0.248      |                                                            | 37               | H18    | 0.452      |                                                    |
| 12     | C6    | 0.018      |                                                            | 38               | C19    | -0.050     |                                                    |
| 13     | H6'   | 0.236      |                                                            | 39               | H19    | 0.245      |                                                    |
| 14     | O6    | -0.775     |                                                            | 40               | C20    | -0.062     |                                                    |
| 15     | H6    | 0.511      |                                                            | 41               | H20    | 0.234      |                                                    |
| 16     | C7    | 0.482      |                                                            | 42               | N21    | -0.579     | Ring3<br>Charge=<br>(-1.204)+<br>(1.418)<br>=0.214 |
| 17     | O7    | -0.585     |                                                            | 43               | C22    | 0.251      |                                                    |
| 18     | H7''  | 0.163      |                                                            | 44               | H22    | 0.240      |                                                    |
| 19     | O8    | -0.425     | 45                                                         | N23              | -0.515 |            |                                                    |
| 20     | H7'   | 0.533      | 46                                                         | H23              | 0.451  |            |                                                    |
| 21     | O9    | -0.426     | 47                                                         | C24              | -0.049 |            |                                                    |
| 22     | H7    | 0.549      | 48                                                         | H24              | 0.244  |            |                                                    |
| 23     | Fe10  | 1.051      | 1.051                                                      | 49               | C25    | -0.062     |                                                    |
| 24     | N11   | -0.584     |                                                            | 50               | H25    | 0.232      |                                                    |
| 25     | C12   | 0.261      |                                                            | Net Charge=2.001 |        |            |                                                    |
| 26     | H12   | 0.245      |                                                            |                  |        |            |                                                    |

<sup>a</sup>The optimized structure of PC6 is shown in Fig. 8.

Table S16: Imaginary frequencies  $\nu^{\text{TS}}$  ( $\text{cm}^{-1}$ ) and Wigner transmission coefficients ( $\Gamma(\text{T})$ ) for hydrogen abstraction from the different pairs of sites of ascorbic acid by  $\text{O}_2^-$  calculated using the barrier energies given in Tables 1 and 2 obtained at M06-2X/6-311+G(d) level of theory in gas phase at room temperature (298.15K).

| Sl. No. | Reaction sites <sup>a</sup> | Without Fe-SOD             |                    | With Fe-SOD <sup>b</sup>   |                    |
|---------|-----------------------------|----------------------------|--------------------|----------------------------|--------------------|
|         |                             | Freq.( $\nu^{\text{TS}}$ ) | $\Gamma(\text{T})$ | Freq.( $\nu^{\text{TS}}$ ) | $\Gamma(\text{T})$ |
| 1       | (O3,O4)                     | i2021.51                   | 4.94               |                            |                    |
| 2       | (O6,C6)                     | i1261.44                   | 2.54               | i946.78                    | 1.86               |
| 3       | (C5,C6)                     | i959.49                    | 1.89               | i457.94                    | 1.20               |
| 4       | (O6,O7)                     | i511.97                    | 1.25               |                            |                    |
| 5       | (C6,C7)                     | i2109.40                   | 5.29               |                            |                    |
| 6       | (C7,O7)                     | i360.44                    | 1.13               | i384.35                    | 1.14               |

<sup>a</sup>Numbering of atomic sites is shown in Fig. 1.

<sup>b</sup>Entries in these columns are irrelevant for barrierless reactions.



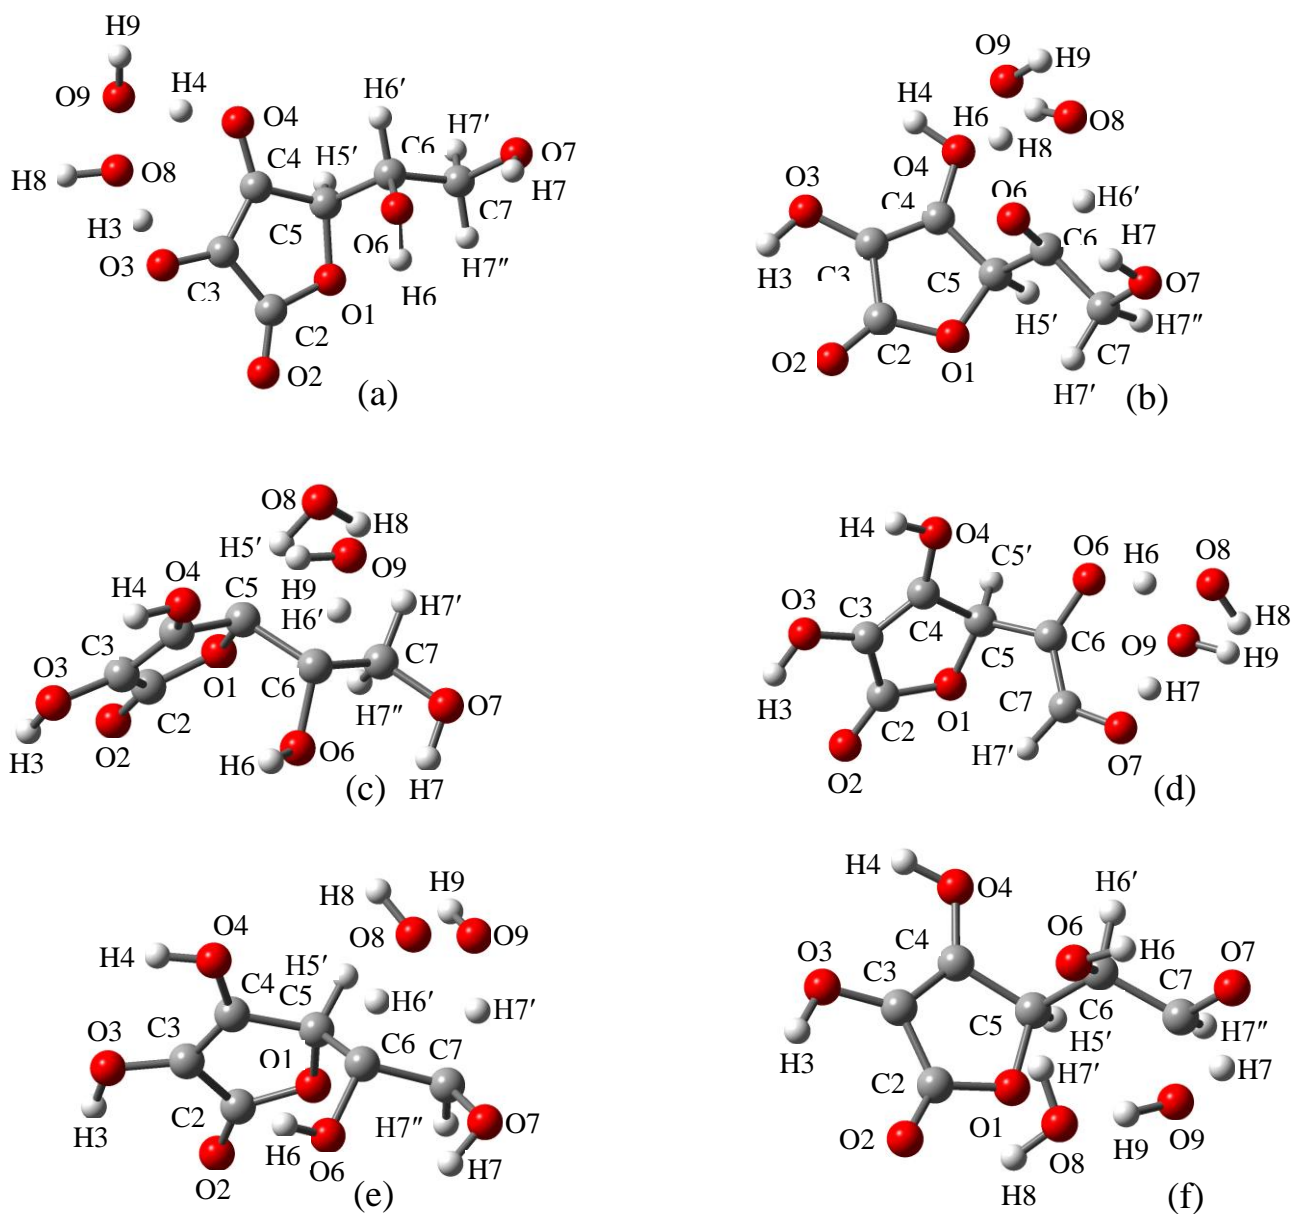

Fig. S17 (a-f). Optimized geometries of transition states involved in the double hydrogen abstraction from the different pairs of sites of ascorbic acid by  $\text{H}_2\text{O}_2$  in absence of Fe-SOD obtained at the M062X/6-311+G(d) level of theory in aqueous media.

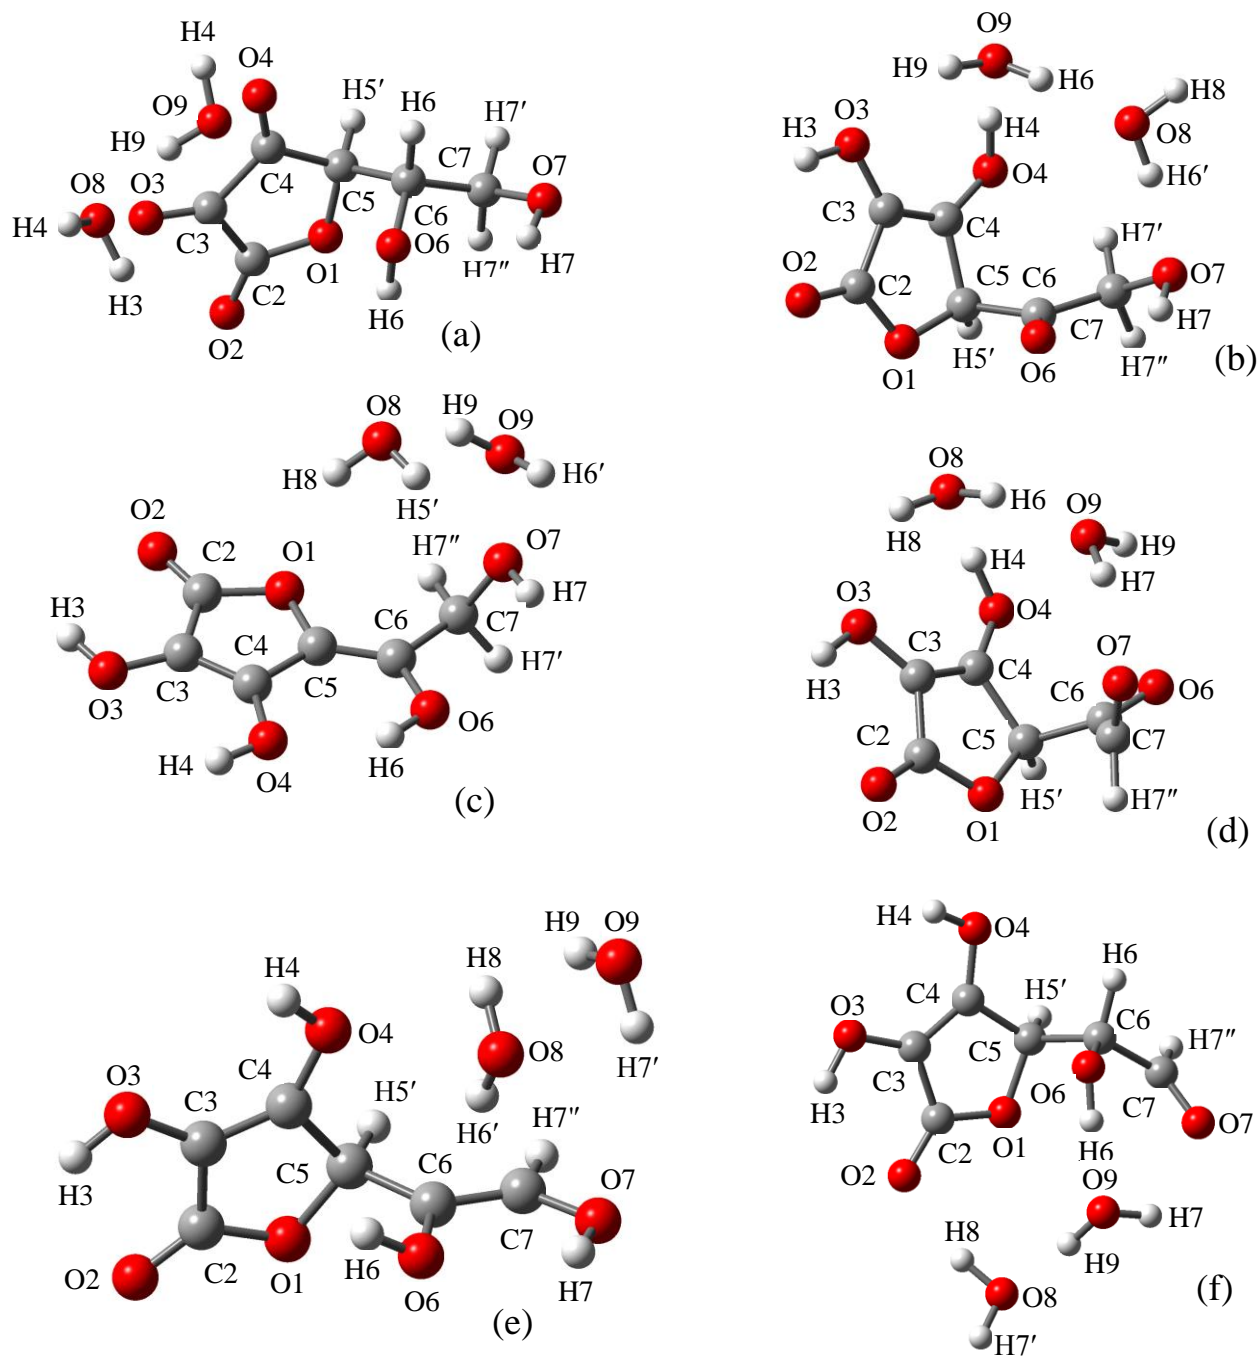

Fig S18 (a-f). Optimized geometries of product complexes formed due to double hydrogen abstraction from the different pairs of sites of ascorbic acid by  $\text{H}_2\text{O}_2$  in absence of Fe-SOD obtained at the M062X/6-311+G(d) level of theory in aqueous media.

1. Cartesian coordinates of TS1 for double hydrogen abstraction from (O3,O4) pair of site of AA in absence of Fe-SOD

|   |             |             |             |
|---|-------------|-------------|-------------|
| C | 1.52078000  | -1.55869400 | -0.20103100 |
| C | 1.56559500  | -0.19318300 | 0.34006800  |
| C | 0.38271900  | 0.04913600  | 1.03731900  |
| C | -0.51101000 | -1.15423400 | 0.78257700  |
| O | 0.31667100  | -2.13129800 | 0.15611900  |
| O | 2.61595900  | 0.59335400  | 0.19214600  |
| O | -0.02447900 | 1.09756700  | 1.62767400  |
| O | 2.34517300  | -2.18249900 | -0.81921700 |
| C | -1.67134200 | -0.81118100 | -0.15952000 |
| C | -2.72479700 | 0.09334000  | 0.47516300  |
| H | -2.24443100 | 1.01489200  | 0.82975000  |
| H | 0.19448900  | 2.02240100  | 0.39995500  |
| H | 2.28653900  | 1.57758400  | -0.07333900 |
| H | -0.91064000 | -1.56799900 | 1.71701900  |
| O | -3.74031300 | 0.35803700  | -0.47318100 |
| O | -1.23544800 | -0.22770400 | -1.37349400 |
| H | -3.25217200 | 0.51959100  | -1.29376000 |
| H | -0.58599800 | 0.47374900  | -1.18628900 |
| O | 1.66832300  | 2.66081000  | -0.60447600 |
| O | 0.36438000  | 2.27699600  | -0.57124800 |
| H | -2.15225100 | -1.75318500 | -0.45196700 |
| H | -3.18934100 | -0.40024700 | 1.33658900  |

2. Cartesian coordinates of TS2 for double hydrogen abstraction from (C6,O6) pair of site of AA in absence of Fe-SOD

|   |             |             |             |
|---|-------------|-------------|-------------|
| C | -1.87948600 | -1.14411600 | -0.20234400 |
| C | -2.23228300 | 0.22217500  | 0.16884400  |
| C | -1.29001400 | 1.03544000  | -0.30191800 |
| C | -0.20778700 | 0.21510800  | -0.94134000 |
| O | -0.73543600 | -1.12429100 | -0.90009100 |
| O | -3.35870700 | 0.511154900 | 0.87192100  |
| O | -1.18414200 | 2.37328100  | -0.21245900 |
| O | -2.53038100 | -2.13030700 | 0.04637000  |
| C | 1.12301000  | 0.28726000  | -0.15958300 |
| C | 1.91992100  | 1.56404500  | -0.50823500 |
| H | 1.26227200  | 2.44491100  | -0.46837300 |
| H | -1.84483700 | 2.69857600  | 0.41071100  |
| H | -3.75671500 | -0.33623700 | 1.11503300  |
| H | -0.05306500 | 0.47760800  | -1.99310000 |
| O | 2.96931300  | 1.70848900  | 0.41785800  |
| O | 1.01824900  | 0.05626000  | 1.12883900  |
| H | 2.69874500  | 1.15686000  | 1.17231500  |
| H | 1.98209700  | -1.46299800 | 1.20591900  |
| O | 2.42604300  | -1.87909100 | -0.57747400 |
| O | 2.76808200  | -1.87679100 | 0.77341400  |
| H | 1.78418000  | -0.66330300 | -0.64540300 |
| H | 2.34298700  | 1.49231300  | -1.51667100 |

3. Cartesian coordinates of TS3 for double hydrogen abstraction from (C5,C6) pair of site of AA in absence of Fe-SOD

|   |             |             |             |
|---|-------------|-------------|-------------|
| C | 2.13193400  | -1.07868900 | 0.37899600  |
| C | 2.24555400  | 0.20447400  | -0.21764300 |
| C | 0.97903100  | 0.66187400  | -0.52482200 |
| C | 0.07464900  | -0.33477300 | -0.13981000 |
| O | 0.77762900  | -1.38196200 | 0.41052000  |
| O | 3.43809500  | 0.84382600  | -0.41301600 |
| O | 0.64683400  | 1.86533300  | -1.07871500 |
| O | 3.00628300  | -1.83098600 | 0.79905500  |
| C | -1.36367900 | -0.38671600 | -0.13304400 |
| H | -1.80620900 | 0.29025400  | 0.84171200  |
| C | -1.96480300 | -1.78742500 | -0.18506900 |
| H | -1.70156700 | -2.34790300 | 0.71622900  |
| H | -1.55993100 | -2.33888400 | -1.05219500 |
| H | 1.46015800  | 2.38432700  | -1.10928300 |
| H | 4.09762200  | 0.24624600  | -0.03030200 |
| H | -0.78019300 | 2.36296700  | 0.42797100  |
| O | -3.37126500 | -1.69981300 | -0.27000300 |
| O | -1.94235800 | 0.42031800  | -1.16039600 |
| H | -3.50869500 | -0.92229600 | -0.83135000 |
| H | -2.33992900 | 1.13806900  | -0.62040700 |
| O | -2.31681100 | 1.53684400  | 1.19356200  |
| O | -1.04807900 | 2.18578200  | 1.34223900  |

4. Cartesian coordinates of TS4 for double hydrogen abstraction from (O6,O7) pair of site of AA in absence of Fe-SOD

|   |             |             |             |
|---|-------------|-------------|-------------|
| C | 2.40058700  | -0.72213400 | -0.48445700 |
| C | 2.23755000  | 0.59377200  | 0.12991900  |
| C | 1.13469100  | 0.56642200  | 0.87928200  |
| C | 0.47504600  | -0.78353600 | 0.75645800  |
| O | 1.40617500  | -1.52870200 | -0.08878900 |
| O | 3.13243400  | 1.58878800  | -0.11550200 |
| O | 0.54795500  | 1.51543800  | 1.62806300  |
| O | 3.31631200  | -1.03869500 | -1.21562600 |
| C | -0.88164300 | -0.70480500 | 0.13896000  |
| C | -1.91862100 | -1.25506600 | 0.79926300  |
| H | -1.70396300 | -1.79403000 | 1.72416600  |
| H | 0.95642000  | 2.36273000  | 1.41121900  |
| H | 3.74165800  | 1.20829300  | -0.76821900 |
| H | 0.43604200  | -1.30281800 | 1.71979100  |
| O | -3.21377100 | -1.24393100 | 0.46569800  |
| O | -0.90974000 | -0.04996500 | -1.03781300 |
| H | -3.53598400 | -0.33120700 | -0.11239100 |
| H | -1.81345400 | 0.60416800  | -1.13224600 |
| O | -2.76702100 | 1.49928200  | -1.07599400 |
| O | -3.85814000 | 0.89340200  | -0.57989400 |

5. Cartesian coordinates of TS5 for double hydrogen abstraction from (C6,C7) pair of site of AA in absence of Fe-SOD

|   |             |             |             |
|---|-------------|-------------|-------------|
| C | -2.43944900 | 0.92926700  | -0.26875000 |
| C | -2.02710300 | -0.52928200 | -0.08844800 |
| C | -0.80118800 | -1.06959700 | -0.19857500 |
| C | 0.37576000  | -0.38398200 | -0.66276000 |
| O | -1.54855800 | 1.78276400  | -0.46000700 |
| O | -3.04347100 | -1.33931000 | 0.33090400  |
| O | -0.60869400 | -2.38935400 | 0.20305400  |
| O | -3.67416400 | 1.07814800  | -0.15890400 |
| C | 1.64587200  | -0.69064300 | -0.31629000 |
| C | 2.75945000  | 0.19878700  | -0.64027600 |
| H | 2.40420300  | 1.30446400  | -0.02762100 |
| H | -1.44530000 | -2.69802300 | 0.57569000  |
| H | -3.81064500 | -0.72826800 | 0.33446700  |
| H | 0.21296000  | 0.51238800  | -1.24621900 |
| O | 4.01730300  | -0.23703500 | -0.25537600 |
| O | 2.00158400  | -1.71498900 | 0.51083000  |
| H | 3.89890000  | -0.85622500 | 0.47628700  |
| H | 1.20480100  | -2.22075500 | 0.73567100  |
| O | 1.82274100  | 2.34751100  | 0.38694100  |
| O | 0.74666400  | 1.90510200  | 1.11334200  |
| H | -0.02877200 | 1.93214600  | 0.50174000  |
| H | 2.77656800  | 0.56428600  | -1.66569900 |

6. Cartesian coordinates of TS6 for double hydrogen abstraction from (C7,O7) pair of site of AA in absence of Fe-SOD

|   |             |             |             |
|---|-------------|-------------|-------------|
| C | 2.45474700  | -0.62569300 | -0.16257300 |
| C | 1.99383200  | 0.75249300  | -0.07028600 |
| C | 0.79201600  | 0.76998000  | 0.52682100  |
| C | 0.46959200  | -0.65410200 | 0.94086300  |
| O | 1.53685400  | -1.44466600 | 0.39134600  |
| O | 2.75138700  | 1.75938700  | -0.56708800 |
| O | 0.05154300  | 1.82600800  | 0.83733200  |
| O | 3.48771500  | -1.00523500 | -0.66199200 |
| C | -0.88989500 | -1.22056400 | 0.53346100  |
| C | -1.27713200 | -0.90687500 | -0.91969300 |
| H | -0.45759600 | -1.15389200 | -1.62062900 |
| H | -0.90869600 | 1.68843500  | 0.60266200  |
| H | 0.53233800  | -0.72586800 | 2.03198500  |
| O | -2.48005100 | -1.32299000 | -1.27696200 |
| O | -1.81073400 | -0.69254100 | 1.46515100  |
| H | -3.35095600 | 0.10856100  | -0.91855900 |
| H | -2.55348600 | -0.27534600 | 0.99512700  |
| O | -2.17240900 | 1.55867300  | -0.53749000 |
| O | -3.35154400 | 0.86504900  | -0.26534600 |
| H | -0.83765400 | -2.31139700 | 0.65478500  |
| H | -1.31547400 | 0.28244900  | -0.95190000 |
| H | 3.53048600  | 1.34612900  | -0.96464000 |

7. Cartesian coordinates of PC1 for double hydrogen abstraction from (O3,O4) pair of site of AA in absence of Fe-SOD

|   |             |             |             |
|---|-------------|-------------|-------------|
| C | 0.68814900  | 2.21421600  | -0.00952800 |
| C | 1.35369700  | 0.87253200  | -0.10253600 |
| C | 0.32452400  | -0.05937200 | -0.44372900 |
| C | -0.95786400 | 0.73442000  | -0.64050700 |
| O | -0.65496000 | 2.08132400  | -0.27724700 |
| O | 2.57290600  | 0.69406600  | 0.13748000  |
| O | 0.31797600  | -1.31179000 | -0.51363900 |
| O | 1.16184900  | 3.28468800  | 0.26238200  |
| C | -2.11320300 | 0.16759200  | 0.18853400  |
| C | -2.91656400 | -0.85907100 | -0.60733900 |
| H | -2.21958900 | -1.62033000 | -0.99197200 |
| H | 1.90327200  | -2.23148900 | -0.58455100 |
| H | 3.14533300  | -0.97955400 | 0.53503100  |
| H | -1.24895800 | 0.72835700  | -1.70164100 |
| O | -3.91476100 | -1.42733900 | 0.21097400  |
| O | -1.68582800 | -0.44055700 | 1.39817000  |
| H | -3.48198800 | -1.52830100 | 1.07154600  |
| H | -0.98023200 | -1.06227300 | 1.15160200  |
| O | 3.20486200  | -1.93888300 | 0.72665600  |
| O | 2.84649200  | -2.48431800 | -0.54638400 |
| H | -2.76842300 | 0.99447400  | 0.48431800  |
| H | -3.41014300 | -0.38031200 | -1.46083800 |

8. Cartesian coordinates of PC2 for double hydrogen abstraction from (C6,O6) pair of site of AA in absence of Fe-SOD

|   |             |             |             |
|---|-------------|-------------|-------------|
| C | -1.87186500 | -1.16003700 | -0.20397800 |
| C | -2.24350000 | 0.20079400  | 0.16771300  |
| C | -1.31946200 | 1.02677700  | -0.31349700 |
| C | -0.21341300 | 0.22943200  | -0.93791600 |
| O | -0.72326300 | -1.12858800 | -0.89740400 |
| O | -3.36876300 | 0.47874100  | 0.87876700  |
| O | -1.21181500 | 2.36353400  | -0.21406600 |
| O | -2.51183300 | -2.15400400 | 0.04633400  |
| C | 1.05329000  | 0.39047000  | -0.12930400 |
| C | 1.90547600  | 1.59674500  | -0.51047100 |
| H | 1.30205200  | 2.52097200  | -0.50670100 |
| H | -1.86887000 | 2.68526000  | 0.41458000  |
| H | -3.75532700 | -0.37264400 | 1.12703000  |
| H | -0.05068300 | 0.49749600  | -1.98673800 |
| O | 2.95646800  | 1.73531500  | 0.41773500  |
| O | 1.01025700  | 0.06897600  | 1.12386000  |
| H | 2.69763600  | 1.16701200  | 1.16276800  |
| H | 2.04010100  | -1.41271000 | 1.19175200  |
| O | 2.46379300  | -1.90111400 | -0.59354700 |
| O | 2.80722200  | -1.87168300 | 0.79011400  |
| H | 2.06880300  | -1.00305900 | -0.73394900 |
| H | 2.32660600  | 1.48316800  | -1.51836400 |

9. Cartesian coordinates of PC3 for double hydrogen abstraction from (C5,C6) pair of site of AA in absence of Fe-SOD

|   |             |             |             |
|---|-------------|-------------|-------------|
| C | -1.99258100 | -1.25395600 | -0.35519300 |
| C | -2.12886900 | 0.02550200  | 0.19994200  |
| C | -0.88130200 | 0.46177200  | 0.63254600  |
| C | 0.05716700  | -0.54155500 | 0.32183600  |
| O | -0.62959700 | -1.57988100 | -0.28039700 |
| O | -3.32568000 | 0.68627300  | 0.33625800  |
| O | -0.55609300 | 1.72595700  | 1.11017600  |
| O | -2.82959400 | -2.02957900 | -0.82527500 |
| C | 1.42696900  | -0.60162600 | 0.45814500  |
| H | 1.42177200  | 1.14951800  | -1.24752600 |
| C | 2.27239900  | -1.77992200 | 0.15831500  |
| H | 1.72857500  | -2.48427800 | -0.46938600 |
| H | 2.56673500  | -2.29576600 | 1.08827100  |
| H | -1.23789900 | 2.00588100  | 1.72903400  |
| H | -3.99343600 | 0.09341800  | -0.03333700 |
| H | -0.15102900 | 2.61241300  | -0.49210800 |
| O | 3.47039000  | -1.40848600 | -0.53491000 |
| O | 2.11314500  | 0.35427700  | 1.21574700  |
| H | 3.76037600  | -0.58501900 | -0.12449400 |
| H | 1.81318800  | 1.23582000  | 0.95725600  |
| O | 1.57833200  | 2.06536800  | -0.95696200 |
| O | 0.37522400  | 2.73691000  | -1.30229300 |

10. Cartesian coordinates of PC4 for double hydrogen abstraction from (O6,O7) pair of site of AA in absence of Fe-SOD

|   |             |             |             |
|---|-------------|-------------|-------------|
| C | -2.29306900 | 0.11568400  | -1.04579300 |
| C | -2.36203300 | -0.40868100 | 0.31613400  |
| C | -1.42189800 | 0.19968600  | 1.04170300  |
| C | -0.62344900 | 1.11029200  | 0.15380900  |
| O | -1.32496500 | 1.04500900  | -1.11556700 |
| O | -3.28150700 | -1.35199100 | 0.65429600  |
| O | -1.07253700 | 0.06324400  | 2.33308300  |
| O | -3.01911400 | -0.21018400 | -1.96040900 |
| C | 0.80995500  | 0.60847700  | -0.01138600 |
| C | 1.83790700  | 1.56829400  | 0.24509100  |
| H | 1.46661700  | 2.57440900  | 0.53133800  |
| H | -1.52889000 | -0.71082600 | 2.68558200  |
| H | -3.72417800 | -1.56962900 | -0.18131000 |
| H | -0.65624200 | 2.15136000  | 0.49156100  |
| O | 3.07266100  | 1.37921700  | 0.17944100  |
| O | 0.95199900  | -0.59755700 | -0.34531300 |
| H | 3.84068000  | -0.10699600 | -0.44398400 |
| H | 2.45737300  | -1.53243600 | -0.07339600 |
| O | 3.37044200  | -1.83126100 | 0.12436500  |
| O | 4.11054100  | -0.99252600 | -0.77078800 |

11. Cartesian coordinates of PC5 for double hydrogen abstraction from (C6,C7) pair of site of AA in absence of Fe-SOD

|   |             |             |             |
|---|-------------|-------------|-------------|
| C | -2.53377000 | 0.52799600  | -0.39736100 |
| C | -1.83048600 | -0.77584600 | -0.06250400 |
| C | -0.49043300 | -1.08666400 | -0.03993900 |
| C | 0.56227100  | -0.24918600 | -0.41790300 |
| O | -1.84841200 | 1.51924300  | -0.71736900 |
| O | -2.68268800 | -1.76333700 | 0.32687800  |
| O | -0.15823900 | -2.35990800 | 0.41618100  |
| O | -3.77591500 | 0.41974400  | -0.29628000 |
| C | 1.94245300  | -0.51522200 | -0.25537500 |
| C | 2.91406600  | 0.38811700  | -0.57049100 |
| H | 0.89249100  | 1.44794100  | 1.22135600  |
| H | -0.97181100 | -2.78626600 | 0.71479900  |
| H | -3.55721700 | -1.31674300 | 0.25970700  |
| H | 0.28657900  | 0.69763500  | -0.86204600 |
| O | 4.23171500  | 0.10273300  | -0.38960600 |
| O | 2.41935800  | -1.70099000 | 0.26503300  |
| H | 4.28192400  | -0.79108300 | -0.02361400 |
| H | 1.66877200  | -2.27598000 | 0.47546000  |
| O | 0.50031400  | 2.30633600  | 1.44423600  |
| O | 0.30015600  | 2.89731400  | 0.16701400  |
| H | -0.58096000 | 2.54587700  | -0.09441400 |
| H | 2.70530900  | 1.37437400  | -0.95851300 |

12. Cartesian coordinates of PC6 for double hydrogen abstraction from (C7,O7) pair of site of AA in absence of Fe-SOD

|   |             |             |             |
|---|-------------|-------------|-------------|
| C | 2.55878600  | -0.80553600 | 0.08425600  |
| C | 2.33227900  | 0.57491600  | -0.32602700 |
| C | 1.18010100  | 0.98722200  | 0.21744400  |
| C | 0.63441100  | -0.13499400 | 1.06511100  |
| O | 1.54412700  | -1.21940300 | 0.87756400  |
| O | 3.21244300  | 1.20004200  | -1.14783800 |
| O | 0.54785200  | 2.15083500  | 0.11379500  |
| O | 3.50169400  | -1.49432600 | -0.22334700 |
| C | -0.81528700 | -0.46995000 | 0.71564700  |
| C | -1.04514400 | -0.82094700 | -0.70120900 |
| H | -0.28416500 | -0.56429200 | -1.44482000 |
| H | -0.36631700 | 2.00232300  | 0.44770900  |
| H | 0.66976500  | 0.14992000  | 2.12154900  |
| O | -2.16541400 | -1.37076500 | -1.07766800 |
| O | -1.47326300 | 0.78193500  | 1.17430200  |
| H | -3.42260600 | -0.97670200 | 0.00462200  |
| H | -2.42143800 | 0.69573700  | 0.96764600  |
| O | -4.03401600 | 0.55898700  | -0.90488200 |
| O | -3.96291700 | -0.19718400 | 0.31194600  |
| H | -1.18827300 | -1.26652000 | 1.37466800  |
| H | -3.31033400 | 0.14944700  | -1.42268600 |
| H | 3.88844200  | 0.54484500  | -1.37099500 |



13. Cartesian coordinates of TS2 for double hydrogen abstraction from (C6,O6) pair of site of AA in presence of Fe-SOD

|    |             |             |             |
|----|-------------|-------------|-------------|
| C  | -5.22169100 | 0.80421600  | -1.11292500 |
| C  | -3.90702700 | 1.07907800  | -1.71859900 |
| C  | -3.00276400 | 0.27281600  | -1.15667200 |
| C  | -3.70214200 | -0.65767800 | -0.21361900 |
| O  | -5.05482800 | -0.21804500 | -0.19071700 |
| O  | -3.69367000 | 2.04903200  | -2.61443500 |
| O  | -1.65812800 | 0.24556800  | -1.27978500 |
| O  | -6.26197300 | 1.34041500  | -1.32504700 |
| C  | -3.29266700 | -0.54752300 | 1.25557800  |
| H  | -1.68970500 | -1.70195500 | 1.14575700  |
| C  | -3.97605100 | -1.48782300 | 2.23576200  |
| H  | -5.00652600 | -1.64737700 | 1.90690200  |
| H  | -3.96558600 | -1.04709500 | 3.23743900  |
| H  | -1.40326400 | 0.99528500  | -1.84641300 |
| H  | -4.53414300 | 2.49320900  | -2.83277500 |
| H  | -3.68690900 | -1.70874900 | -0.53682700 |
| O  | -3.30159500 | -2.72393600 | 2.14817100  |
| O  | -2.54511300 | 0.36834600  | 1.65993000  |
| H  | -2.50592600 | -2.72477400 | 2.70441400  |
| H  | -1.37576500 | 0.22778000  | 1.44019600  |
| C  | 2.54352600  | -4.03408200 | -0.50853700 |
| N  | 1.35098600  | -3.85674400 | -1.17267800 |
| C  | 2.89125300  | -2.80124600 | -0.04140900 |
| H  | 0.81232800  | -4.58387500 | -1.62892200 |
| C  | 1.00447500  | -2.56457900 | -1.08970700 |
| N  | 1.91639200  | -1.88720700 | -0.40799000 |
| H  | 3.76016700  | -2.51514500 | 0.53316600  |
| H  | 0.11549900  | -2.12819600 | -1.51460700 |
| C  | 5.90235300  | 0.74709400  | -0.01169400 |
| N  | 5.71247500  | 0.01247900  | -1.15763300 |
| C  | 4.66741800  | 0.87097300  | 0.55435900  |
| H  | 6.43432000  | -0.25225400 | -1.81902600 |
| C  | 4.41173400  | -0.30114100 | -1.26089900 |
| N  | 3.74239300  | 0.20762900  | -0.23253300 |
| H  | 4.38336700  | 1.38631100  | 1.46009600  |
| H  | 3.99310700  | -0.89596500 | -2.06055500 |
| C  | 1.95119900  | 4.22675200  | 0.48320500  |
| N  | 1.06105300  | 3.88551000  | 1.47506400  |
| C  | 2.35346800  | 3.04796900  | -0.07122600 |
| H  | 0.58058500  | 4.52902500  | 2.09394000  |
| C  | 0.94191900  | 2.55217500  | 1.49154700  |
| N  | 1.71548800  | 1.99663100  | 0.57128700  |
| H  | 3.06292600  | 2.88555100  | -0.86942500 |
| H  | 0.30814400  | 2.00459800  | 2.16873600  |
| Fe | 1.79986900  | 0.03588200  | 0.16016800  |
| H  | 2.21495600  | 5.25063900  | 0.26667800  |
| H  | 6.87293400  | 1.10775500  | 0.29272400  |
| H  | 3.02351500  | -4.99699200 | -0.42536100 |
| O  | -0.72916900 | -1.62846700 | 0.94124400  |
| O  | -0.26454500 | -0.35301300 | 1.35812400  |

14. Cartesian coordinates of TS3 for double hydrogen abstraction from (C5,C6) pair of site of AA in presence of Fe-SOD

|    |             |             |             |
|----|-------------|-------------|-------------|
| C  | -3.87340700 | -1.00064000 | -0.04078100 |
| C  | -4.61888500 | 0.28041000  | -0.15552600 |
| C  | -3.78368200 | 1.27071800  | 0.24961800  |
| C  | -2.56286300 | 0.62931100  | 0.66322400  |
| O  | -2.61715700 | -0.68854800 | 0.52887100  |
| O  | -5.84021200 | 0.38968200  | -0.62948900 |
| O  | -3.89571200 | 2.60137800  | 0.27977300  |
| O  | -4.17844700 | -2.09863000 | -0.35541400 |
| C  | -1.38577900 | 1.28638500  | 1.24547400  |
| H  | -0.79015500 | 1.57247400  | 0.31323300  |
| C  | -0.46188300 | 0.34231300  | 2.02466400  |
| H  | -0.77119200 | -0.69932900 | 1.94678700  |
| H  | -0.46467800 | 0.64932000  | 3.07297200  |
| H  | -4.80248700 | 2.88754600  | 0.07106800  |
| H  | -6.24412500 | -0.48108300 | -0.80628100 |
| H  | -1.70739300 | 1.29784800  | -2.16831500 |
| O  | 0.88131800  | 0.38248900  | 1.51553300  |
| O  | -1.70263800 | 2.39086800  | 2.04786300  |
| H  | 1.30488400  | 1.21783400  | 1.77915600  |
| H  | -2.04701400 | 3.12026600  | 1.50882800  |
| O  | -1.39751700 | 0.65055400  | -1.51139800 |
| O  | -0.12045000 | 1.18843200  | -1.18958100 |
| C  | -0.68038100 | -3.64605700 | 0.23183500  |
| N  | -1.24980000 | -3.29691700 | -0.96824500 |
| C  | 0.18554600  | -2.63551200 | 0.52908700  |
| H  | -1.93875900 | -3.83631100 | -1.47644800 |
| C  | -0.73832000 | -2.11490700 | -1.35596000 |
| N  | 0.13325100  | -1.67586700 | -0.46305700 |
| H  | 0.85385000  | -2.54319600 | 1.37266600  |
| H  | -1.03070100 | -1.59852300 | -2.25671700 |
| C  | 4.46749600  | -2.15117400 | 1.26207900  |
| N  | 4.72256500  | -2.28487100 | -0.07847800 |
| C  | 3.31971800  | -1.41594400 | 1.34392100  |
| H  | 5.50370600  | -2.78098900 | -0.48902600 |
| C  | 3.75315700  | -1.64656200 | -0.76101800 |
| N  | 2.88136100  | -1.10526600 | 0.07183100  |
| H  | 2.78295400  | -1.09262800 | 2.22299500  |
| H  | 3.72347400  | -1.59602600 | -1.84008800 |
| C  | 4.11554800  | 3.09945100  | -0.19075200 |
| N  | 3.20006200  | 3.64034300  | -1.05966500 |
| C  | 3.62480100  | 1.86979700  | 0.13628400  |
| H  | 3.26875000  | 4.54699400  | -1.50458400 |
| C  | 2.20091500  | 2.75827900  | -1.23441800 |
| N  | 2.42395000  | 1.66487600  | -0.51933700 |
| H  | 4.05852900  | 1.12014100  | 0.78145500  |
| H  | 1.33782800  | 2.92696500  | -1.86044500 |
| Fe | 1.25331700  | 0.00485600  | -0.44582300 |
| H  | 5.01111200  | 3.62264500  | 0.10486900  |
| H  | 5.10722800  | -2.57923100 | 2.01766400  |
| H  | -0.92713900 | -4.56205900 | 0.74461200  |

15. Cartesian coordinates of TS5 for double hydrogen abstraction from (C6,C7) pair of site of AA in presence of Fe-SOD

|    |             |             |             |
|----|-------------|-------------|-------------|
| C  | -3.66575600 | 1.29914300  | 0.15167500  |
| C  | -3.72336700 | 0.55755900  | -1.10675600 |
| C  | -3.75290800 | -0.75277000 | -0.82554600 |
| C  | -3.80659000 | -0.91009600 | 0.67622600  |
| O  | -3.66465100 | 0.40022200  | 1.19511200  |
| O  | -3.68285300 | 1.12643900  | -2.32275400 |
| O  | -3.79113000 | -1.83768200 | -1.59394700 |
| O  | -3.59399100 | 2.48610600  | 0.32108100  |
| C  | -2.77891400 | -1.81264700 | 1.29029100  |
| C  | -1.81452300 | -1.41939300 | 2.24674600  |
| H  | -2.08058200 | -0.62296200 | 2.94276000  |
| H  | -3.94932100 | -1.59621700 | -2.52437300 |
| H  | -3.91553200 | 2.06947200  | -2.26440300 |
| H  | -4.78445300 | -1.32052500 | 0.97628400  |
| O  | -1.11515300 | -2.53040500 | 2.74362200  |
| O  | -2.79305500 | -3.02777300 | 0.86083100  |
| C  | 3.14488100  | -3.63746900 | -0.58018600 |
| N  | 3.31363700  | -3.26875800 | -1.89287900 |
| C  | 2.51683800  | -2.58305500 | 0.02064000  |
| H  | 3.74470300  | -3.83118600 | -2.61802600 |
| C  | 2.80161900  | -2.03549400 | -2.06123100 |
| N  | 2.31344200  | -1.58404800 | -0.91381900 |
| H  | 2.19966700  | -2.46479800 | 1.04663500  |
| H  | 2.80701200  | -1.51013500 | -3.00661300 |
| C  | 4.53590800  | 2.16378300  | 1.59922300  |
| N  | 5.22191800  | 1.12598500  | 1.01475000  |
| C  | 3.23995900  | 2.01762400  | 1.20032100  |
| H  | 6.21499800  | 0.94614100  | 1.10477100  |
| C  | 4.35804100  | 0.39065900  | 0.29638500  |
| N  | 3.13767000  | 0.90593500  | 0.38314800  |
| H  | 2.38214100  | 2.62541000  | 1.44313400  |
| H  | 4.63777400  | -0.49252400 | -0.25894200 |
| C  | -0.01614200 | 4.13668200  | -0.68012200 |
| N  | -0.98330700 | 3.50897600  | 0.06363400  |
| C  | 0.94158700  | 3.18982600  | -0.91406800 |
| H  | -1.86979400 | 3.89404900  | 0.37586000  |
| C  | -0.60985600 | 2.23477300  | 0.25950100  |
| N  | 0.55803100  | 2.00364200  | -0.31868800 |
| H  | 1.87267900  | 3.28714000  | -1.45430200 |
| H  | -1.17808400 | 1.52125800  | 0.83720300  |
| Fe | 1.46235000  | 0.21626900  | -0.45404700 |
| H  | -0.09058500 | 5.17186100  | -0.97566800 |
| H  | 5.01756800  | 2.89224400  | 2.23309500  |
| H  | 3.47903200  | -4.59098200 | -0.20069600 |
| O  | -0.42099600 | -0.75053800 | -0.59044900 |
| O  | 0.18393100  | -0.70510500 | 0.71826300  |
| H  | -0.26897000 | -1.67243300 | -0.87581300 |
| H  | -0.92435700 | -0.87640600 | 1.48679600  |
| H  | -1.28949400 | -2.66297400 | 3.68945400  |
| H  | -2.15673200 | -3.55639800 | 1.40236600  |

16. Cartesian coordinates of TS6 for double hydrogen abstraction from (C7,O7) pair of site of AA in presence of Fe-SOD

|    |             |             |             |
|----|-------------|-------------|-------------|
| C  | 3.68096800  | -1.11599600 | -0.52073500 |
| C  | 4.88786400  | -0.76937800 | 0.24620600  |
| C  | 4.54666000  | 0.17551400  | 1.13431800  |
| C  | 3.11995700  | 0.58871700  | 0.87937000  |
| O  | 2.64217000  | -0.37038400 | -0.03030500 |
| O  | 6.08832600  | -1.33659900 | 0.06272500  |
| O  | 5.23955800  | 0.87109400  | 2.04249000  |
| O  | 3.54939100  | -1.90056000 | -1.41750800 |
| C  | 3.17288500  | 2.01554500  | 0.18878600  |
| C  | 1.92884200  | 2.87625500  | 0.32963500  |
| H  | 1.94323900  | 3.56057600  | 1.19339000  |
| H  | 6.15735900  | 0.55389200  | 2.11017900  |
| H  | 6.02856400  | -2.04055800 | -0.60700800 |
| H  | 2.50337600  | 0.57094200  | 1.78594900  |
| O  | 0.97897500  | 2.92252700  | -0.46310000 |
| O  | 3.43403900  | 1.88994600  | -1.17573800 |
| H  | 0.64133500  | 1.81297300  | -0.94903900 |
| H  | 4.36473900  | 2.07290000  | -1.37292800 |
| C  | -3.46237300 | 3.66784700  | 0.43685300  |
| N  | -3.04231100 | 3.82860800  | -0.86112200 |
| C  | -3.16152400 | 2.37544600  | 0.76154000  |
| H  | -3.13324300 | 4.67295600  | -1.41495800 |
| C  | -2.51142400 | 2.66983000  | -1.28855700 |
| N  | -2.56906300 | 1.75985800  | -0.32569700 |
| H  | -3.32124400 | 1.85268900  | 1.69399100  |
| H  | -2.10642300 | 2.52339700  | -2.28077100 |
| C  | -4.88464500 | -2.43047300 | 1.30616600  |
| N  | -5.57776600 | -1.35190200 | 0.81029500  |
| C  | -3.56868500 | -2.16081700 | 1.07346700  |
| H  | -6.58497000 | -1.23763000 | 0.82063600  |
| C  | -4.70009800 | -0.47250300 | 0.30423800  |
| N  | -3.45995000 | -0.92887800 | 0.45193000  |
| H  | -2.70290500 | -2.76252300 | 1.30094000  |
| H  | -4.98020400 | 0.46976300  | -0.14490300 |
| C  | -0.30278000 | -3.95569600 | -1.13932800 |
| N  | 0.35257200  | -3.63630900 | 0.02336100  |
| C  | -1.10352900 | -2.88544500 | -1.41090400 |
| H  | 1.03508300  | -4.21537100 | 0.49729200  |
| C  | -0.02360800 | -2.40295800 | 0.40750200  |
| N  | -0.93076500 | -1.92547800 | -0.43336900 |
| H  | -1.79358700 | -2.75377500 | -2.23183900 |
| H  | 0.35913400  | -1.91088700 | 1.29032400  |
| Fe | -1.81992500 | -0.12420400 | -0.34397400 |
| H  | -0.15115600 | -4.89032800 | -1.65630300 |
| H  | -5.37712200 | -3.26915600 | 1.77375200  |
| H  | -3.90939500 | 4.46936500  | 1.00497900  |
| O  | -0.07979900 | 0.51417900  | 0.58833700  |
| O  | 0.01863400  | 0.73742800  | -0.80446900 |
| H  | 3.96707700  | 2.53959300  | 0.73855800  |
| H  | 0.28796000  | 1.31280800  | 1.06250900  |

17. Cartesian coordinates of PC1 for double hydrogen abstraction from (O3,O4) pair of site of AA in presence of Fe-SOD

|    |             |             |             |
|----|-------------|-------------|-------------|
| C  | -4.46042300 | 0.62147300  | -1.39171900 |
| C  | -2.99500000 | 0.28178600  | -1.10699500 |
| C  | -3.02650500 | -1.04864500 | -0.33717600 |
| C  | -4.49620900 | -1.28987400 | -0.05232700 |
| O  | -5.19322800 | -0.43974400 | -0.97875000 |
| O  | -2.02626800 | 0.89668400  | -1.45010500 |
| O  | -2.07115500 | -1.68249200 | 0.01415800  |
| O  | -4.87216300 | 1.57142500  | -1.95610600 |
| C  | -4.72822800 | -0.78860100 | 1.37163900  |
| H  | -4.23139900 | -1.47023900 | 2.07282000  |
| C  | -6.19463500 | -0.64180100 | 1.74651900  |
| H  | -6.64673300 | -1.62856900 | 1.88962700  |
| H  | -6.73415000 | -0.09993300 | 0.96418500  |
| H  | -4.81410700 | -2.31922900 | -0.21486600 |
| O  | -6.14729800 | 0.09934200  | 2.94997600  |
| O  | -4.08210800 | 0.47541700  | 1.37692100  |
| H  | -7.02981100 | 0.33266500  | 3.25459800  |
| H  | -4.44883700 | 1.00050300  | 2.10415000  |
| O  | 0.36865300  | -0.34022500 | -1.38117500 |
| O  | 0.24650700  | -0.26718200 | 0.03555900  |
| C  | 2.27698800  | 4.20758500  | -0.85683600 |
| N  | 0.93658000  | 3.99995200  | -0.64506200 |
| C  | 2.85492200  | 2.97737700  | -0.77639900 |
| H  | 0.21951800  | 4.71244300  | -0.64199200 |
| C  | 0.73039800  | 2.68826900  | -0.44924300 |
| N  | 1.87818100  | 2.03094600  | -0.52258800 |
| H  | 3.89468100  | 2.71234200  | -0.88550100 |
| H  | -0.23939600 | 2.25792100  | -0.24981700 |
| C  | 5.57995100  | 0.06639700  | 2.01797200  |
| N  | 4.81463500  | 1.06266400  | 2.57501500  |
| C  | 4.84465400  | -0.42742800 | 0.98496800  |
| H  | 5.06901300  | 1.62771300  | 3.37366000  |
| C  | 3.66778200  | 1.15859100  | 1.88754800  |
| N  | 3.64645000  | 0.26255700  | 0.91153800  |
| H  | 5.08976000  | -1.22036000 | 0.29771800  |
| H  | 2.88767800  | 1.86938700  | 2.10968100  |
| C  | 2.91472600  | -4.09109100 | -0.06526500 |
| N  | 2.75966500  | -3.97421100 | -1.42570700 |
| C  | 2.79002400  | -2.82866200 | 0.42804900  |
| H  | 2.80500000  | -4.72991000 | -2.09536900 |
| C  | 2.54665300  | -2.68311000 | -1.72207200 |
| N  | 2.56290100  | -1.95244200 | -0.61787700 |
| H  | 2.85284800  | -2.48967400 | 1.44943200  |
| H  | 2.38474400  | -2.31847600 | -2.72459300 |
| Fe | 2.20936600  | 0.03289800  | -0.45862300 |
| H  | 3.09347800  | -5.03809600 | 0.41585500  |
| H  | 6.55502000  | -0.19296800 | 2.39476300  |
| H  | 2.68895100  | 5.18513900  | -1.04414900 |
| H  | -0.33486200 | 0.27472600  | -1.68692100 |
| H  | -0.30791200 | -1.04640700 | 0.25786400  |

18. Cartesian coordinates of PC2 for double hydrogen abstraction from (C6,O6) pair of site of AA in presence of Fe-SOD

|    |             |             |             |
|----|-------------|-------------|-------------|
| C  | 5.53308000  | 0.91502100  | 0.14084700  |
| C  | 4.56218600  | 1.86604000  | -0.43218600 |
| C  | 3.33537200  | 1.41001100  | -0.19073200 |
| C  | 3.42934700  | 0.10492400  | 0.54787900  |
| O  | 4.81912200  | -0.10457800 | 0.73204100  |
| O  | 4.89742700  | 2.99743700  | -1.05380700 |
| O  | 2.13440300  | 1.97398000  | -0.47125800 |
| O  | 6.71507500  | 0.97912000  | 0.12812800  |
| C  | 2.82177000  | -1.10515600 | -0.16986600 |
| C  | 3.65745000  | -2.36239600 | -0.14272500 |
| H  | 4.08107300  | -2.47479800 | 0.86378600  |
| H  | 2.27829600  | 2.76641600  | -1.00866100 |
| H  | 5.85984200  | 3.10912700  | -1.07459400 |
| H  | 2.94833200  | 0.16358700  | 1.53514300  |
| O  | 2.87778700  | -3.46212600 | -0.52214200 |
| O  | 1.72272100  | -1.05721400 | -0.67129100 |
| H  | 3.43647200  | -4.13832200 | -0.91936700 |
| C  | -3.94085000 | 3.75161300  | 0.81700300  |
| N  | -3.02109600 | 4.04691900  | -0.15856700 |
| C  | -3.71276400 | 2.45175700  | 1.15462600  |
| H  | -2.92283700 | 4.93677800  | -0.62789200 |
| C  | -2.27162400 | 2.95460300  | -0.38526300 |
| N  | -2.66454100 | 1.96291300  | 0.39827600  |
| H  | -4.22671600 | 1.84519800  | 1.88345600  |
| H  | -1.48274800 | 2.90358600  | -1.11989500 |
| C  | -5.37454900 | -2.03473800 | -0.60383600 |
| N  | -5.57883200 | -0.83641400 | -1.24579900 |
| C  | -4.16409800 | -1.92330200 | 0.00580300  |
| H  | -6.38695600 | -0.59366600 | -1.80242000 |
| C  | -4.52590400 | -0.04099800 | -1.01559900 |
| N  | -3.63640500 | -0.66944100 | -0.25894600 |
| H  | -3.64113900 | -2.64578900 | 0.60955100  |
| H  | -4.43361300 | 0.96118400  | -1.40220100 |
| C  | -0.18058500 | -3.59125700 | -0.33090000 |
| N  | 0.33350200  | -3.37459500 | 0.92007200  |
| C  | -1.08213500 | -2.59418300 | -0.53536500 |
| H  | 1.07177200  | -3.92050400 | 1.34143900  |
| C  | -0.23244800 | -2.27208900 | 1.43348200  |
| N  | -1.10468900 | -1.76736600 | 0.57510200  |
| H  | -1.70502600 | -2.40663800 | -1.39522900 |
| H  | 0.00261600  | -1.87404300 | 2.40841100  |
| Fe | -1.93195000 | 0.07369100  | 0.47779800  |
| H  | 0.14543000  | -4.40668900 | -0.95258000 |
| H  | -6.09208600 | -2.83729400 | -0.63658400 |
| H  | -4.65247500 | 4.47451700  | 1.17983500  |
| O  | -0.29876000 | 0.62105000  | -0.61753600 |
| O  | 0.02521600  | 0.80746900  | 0.75744600  |
| H  | 4.51443600  | -2.18818000 | -0.80729300 |
| H  | 0.41110000  | -0.02500800 | -0.88697000 |
| H  | 0.45993100  | 1.68027500  | 0.76668000  |

19. Cartesian coordinates of PC3 for double hydrogen abstraction from (C5,C6) pair of site of AA in presence of Fe-SOD

|    |             |             |             |
|----|-------------|-------------|-------------|
| C  | -3.91945300 | -0.77809300 | 0.07393900  |
| C  | -4.32225700 | 0.56726600  | -0.36224400 |
| C  | -3.41731400 | 1.43809400  | 0.13143800  |
| C  | -2.44690900 | 0.68359000  | 0.90859600  |
| O  | -2.79973000 | -0.65246000 | 0.87424600  |
| O  | -5.37017500 | 0.82067200  | -1.14994600 |
| O  | -3.27558900 | 2.77379800  | 0.01235400  |
| O  | -4.39987200 | -1.83635400 | -0.22057400 |
| C  | -1.35305600 | 1.11840100  | 1.55548300  |
| H  | -1.20687300 | 0.75456600  | -1.36181600 |
| C  | -0.44521700 | 0.21584100  | 2.32360400  |
| H  | -0.84178300 | -0.79783500 | 2.34710200  |
| H  | -0.32315300 | 0.58530600  | 3.34542400  |
| H  | -4.07406000 | 3.17429900  | -0.37454000 |
| H  | -5.91758300 | 0.02005500  | -1.23887500 |
| H  | 0.82027400  | 1.16244300  | -2.79914400 |
| O  | 0.86600300  | 0.14976700  | 1.70702400  |
| O  | -0.94811500 | 2.41474400  | 1.55477400  |
| H  | 1.43999400  | 0.82821300  | 2.09642600  |
| H  | -1.64236200 | 2.99123500  | 1.18094500  |
| O  | 0.42779200  | 0.42106800  | -2.29370900 |
| O  | -0.29936200 | 1.11475900  | -1.26862100 |
| C  | -1.20259600 | -3.43148300 | 0.45060800  |
| N  | -1.76726300 | -3.03388000 | -0.73101100 |
| C  | -0.16984700 | -2.56653000 | 0.67346600  |
| H  | -2.61605800 | -3.41374200 | -1.13548800 |
| C  | -1.10129300 | -1.95887300 | -1.18217500 |
| N  | -0.12156400 | -1.63804600 | -0.34613600 |
| H  | 0.54260800  | -2.54569900 | 1.48591100  |
| H  | -1.32616500 | -1.47410400 | -2.12336200 |
| C  | 4.66153400  | -2.03554600 | 0.73738100  |
| N  | 4.06499100  | -2.95147900 | -0.09318900 |
| C  | 3.80625700  | -0.97404800 | 0.78290600  |
| H  | 4.44144700  | -3.85702000 | -0.34596600 |
| C  | 2.89505800  | -2.44473800 | -0.51920400 |
| N  | 2.70413200  | -1.23909800 | -0.00510100 |
| H  | 3.91856300  | -0.04166500 | 1.31549400  |
| H  | 2.21544400  | -2.96927600 | -1.17507100 |
| C  | 3.93016300  | 3.03612400  | -0.82376300 |
| N  | 2.93934100  | 3.68373400  | -0.12801900 |
| C  | 3.50750600  | 1.74432300  | -0.94618200 |
| H  | 2.94439000  | 4.66143100  | 0.13701400  |
| C  | 1.96125500  | 2.80378000  | 0.14867500  |
| N  | 2.27623000  | 1.60818100  | -0.33334400 |
| H  | 4.00818600  | 0.90776900  | -1.41112100 |
| H  | 1.04857900  | 3.04670300  | 0.67892600  |
| Fe | 1.12004600  | -0.04783000 | -0.29488300 |
| H  | 4.82491600  | 3.53820500  | -1.15732600 |
| H  | 5.61497200  | -2.21541900 | 1.20848600  |
| H  | -1.57418900 | -4.27437400 | 1.01199800  |

20. Cartesian coordinates of PC4 for double hydrogen abstraction from (O6,O7) pair of site of AA in presence of Fe-SOD

|    |             |             |             |
|----|-------------|-------------|-------------|
| C  | 5.63947400  | 0.92673000  | -0.40087100 |
| C  | 5.71378700  | 0.30295300  | 0.93607300  |
| C  | 5.07052700  | -0.86162500 | 0.88375200  |
| C  | 4.54890700  | -1.05650000 | -0.51811500 |
| O  | 4.94424000  | 0.07964400  | -1.23548300 |
| O  | 6.31706500  | 0.87501300  | 1.98070200  |
| O  | 4.78510800  | -1.81266700 | 1.78834900  |
| O  | 6.07989000  | 1.97496400  | -0.73623400 |
| C  | 3.03875000  | -1.17366300 | -0.48205100 |
| C  | 2.44105700  | -2.41530600 | 0.23710900  |
| H  | 3.09004700  | -3.27155900 | 0.46393900  |
| H  | 5.23050400  | -1.64709800 | 2.63094400  |
| H  | 6.78514100  | 1.67590600  | 1.70167200  |
| H  | 4.97144000  | -1.96221700 | -0.97594700 |
| O  | 1.27137700  | -2.41884400 | 0.52811200  |
| O  | 2.28546900  | -0.36573400 | -0.94877100 |
| H  | 0.13122200  | -1.11076300 | 0.45415900  |
| H  | 0.42475800  | -0.09687300 | -1.61046700 |
| C  | -0.69159400 | 4.05543800  | -0.23953000 |
| N  | -1.00939000 | 4.00509200  | -1.57501100 |
| C  | -1.06123100 | 2.84858200  | 0.27199200  |
| H  | -0.85922700 | 4.74326000  | -2.24939100 |
| C  | -1.54807300 | 2.80439500  | -1.84123100 |
| N  | -1.59890100 | 2.07291100  | -0.73812400 |
| H  | -0.97374800 | 2.48145400  | 1.28193200  |
| H  | -1.88423900 | 2.50706900  | -2.82289600 |
| C  | -5.05406100 | 0.58091700  | 2.55759700  |
| N  | -5.02947200 | 1.85073300  | 2.03191600  |
| C  | -4.15311600 | -0.13490400 | 1.83229800  |
| H  | -5.58962000 | 2.63218100  | 2.34373600  |
| C  | -4.13757100 | 1.88402200  | 1.03240400  |
| N  | -3.58207700 | 0.68925700  | 0.87824800  |
| H  | -3.87500700 | -1.17097400 | 1.92737000  |
| H  | -3.91516100 | 2.76579400  | 0.45293000  |
| C  | -4.27350900 | -3.47243500 | -0.94878800 |
| N  | -2.98682300 | -3.91724400 | -0.75318700 |
| C  | -4.21995800 | -2.11904600 | -0.80967200 |
| H  | -2.68242300 | -4.88062400 | -0.77154700 |
| C  | -2.20836300 | -2.85477300 | -0.49994200 |
| N  | -2.91615300 | -1.74098600 | -0.53710400 |
| H  | -5.02086900 | -1.40027100 | -0.88236800 |
| H  | -1.14645100 | -2.93216300 | -0.32534300 |
| Fe | -2.23196100 | 0.16070500  | -0.49082000 |
| H  | -5.08991500 | -4.14112800 | -1.16420600 |
| H  | -5.69000300 | 0.30964300  | 3.38340800  |
| H  | -0.23668400 | 4.92085700  | 0.21257400  |
| O  | -0.38734100 | -0.54098500 | -1.29679100 |
| O  | -0.34696400 | -0.31737400 | 0.10730700  |



21. Cartesian coordinates of PC5 for double hydrogen abstraction from (C6,C7) pair of site of AA in presence of Fe-SOD

|    |             |             |             |
|----|-------------|-------------|-------------|
| C  | -5.14348000 | 0.07132200  | 0.58286100  |
| C  | -4.23502600 | 0.67200000  | -0.41872200 |
| C  | -3.39012700 | -0.27357300 | -0.82809200 |
| C  | -3.69178100 | -1.56608900 | -0.10426800 |
| O  | -4.77981800 | -1.23501100 | 0.76212800  |
| O  | -4.31590200 | 1.97686800  | -0.75304300 |
| O  | -2.35666800 | -0.25011700 | -1.71222900 |
| O  | -6.02807000 | 0.62495200  | 1.16180200  |
| C  | -2.52797000 | -2.01924400 | 0.72816200  |
| H  | -0.65977700 | -0.77772400 | -1.26739900 |
| C  | -1.70979000 | -3.01358900 | 0.38372700  |
| H  | 0.28778300  | -1.84329600 | 0.74430600  |
| H  | -1.83484300 | -3.62886300 | -0.49932700 |
| H  | -2.44188300 | 0.51111800  | -2.31406700 |
| H  | -5.18140700 | 2.32156200  | -0.45565900 |
| H  | -4.00755000 | -2.34941300 | -0.80190900 |
| O  | -0.55400000 | -3.27012400 | 1.10220400  |
| O  | -2.23276400 | -1.25368600 | 1.82430400  |
| H  | -0.75380600 | -3.23587900 | 2.05578800  |
| H  | -3.04849200 | -1.09146500 | 2.33262300  |
| C  | 4.42653100  | -2.95352200 | 0.12019200  |
| N  | 4.15754400  | -3.07678100 | -1.22104000 |
| C  | 3.72745800  | -1.85679500 | 0.53461200  |
| H  | 4.52533000  | -3.79338100 | -1.83689700 |
| C  | 3.32349500  | -2.08842200 | -1.58583300 |
| N  | 3.04321700  | -1.32021600 | -0.54164700 |
| H  | 3.66499400  | -1.42145600 | 1.52175700  |
| H  | 2.94454200  | -1.96299900 | -2.59047400 |
| C  | 3.84173400  | 3.02960300  | 1.81866900  |
| N  | 4.86875800  | 2.32833100  | 1.23218600  |
| C  | 2.69541300  | 2.42373100  | 1.39701200  |
| H  | 5.85746400  | 2.52788400  | 1.33486100  |
| C  | 4.34810600  | 1.33613300  | 0.49491400  |
| N  | 3.02094600  | 1.36148600  | 0.57216400  |
| H  | 1.67059000  | 2.66992700  | 1.62837800  |
| H  | 4.93880200  | 0.63027700  | -0.07154600 |
| C  | -0.73793700 | 3.51385000  | -1.22998100 |
| N  | -1.52591000 | 2.78582900  | -0.37254200 |
| C  | 0.44265500  | 2.83113300  | -1.31277400 |
| H  | -2.49730700 | 2.98035900  | -0.14112700 |
| C  | -0.83485500 | 1.70857000  | 0.03910300  |
| N  | 0.36836500  | 1.69989200  | -0.52340600 |
| H  | 1.33115200  | 3.08292600  | -1.87417700 |
| H  | -1.22230700 | 0.96314200  | 0.72406800  |
| Fe | 1.74531400  | 0.22259100  | -0.44157900 |
| H  | -1.07363400 | 4.43189800  | -1.68799700 |
| H  | 4.01484600  | 3.87330600  | 2.46902700  |
| H  | 5.07109200  | -3.64010000 | 0.64764300  |
| O  | 0.24819600  | -1.10913200 | -1.03663200 |
| O  | 0.30643000  | -0.90570300 | 0.37967600  |

22. Cartesian coordinates of PC6 for double hydrogen abstraction from (C7,O7) pair of site of AA in presence of Fe-SOD

|    |             |             |             |
|----|-------------|-------------|-------------|
| C  | 3.22259800  | 0.33603200  | -1.29719400 |
| C  | 4.33554200  | 0.93517700  | -0.55366500 |
| C  | 4.81601000  | 0.01092900  | 0.28453100  |
| C  | 4.06055500  | -1.26809500 | 0.09229600  |
| O  | 3.11605200  | -0.97911500 | -0.93373400 |
| O  | 4.70027800  | 2.22780400  | -0.63807300 |
| O  | 5.74748500  | 0.04993000  | 1.23173500  |
| O  | 2.48575300  | 0.85145900  | -2.08628100 |
| C  | 3.28297200  | -1.69820700 | 1.35376300  |
| C  | 2.50076600  | -2.94115400 | 0.97197800  |
| H  | 3.03356500  | -3.90165400 | 1.06154200  |
| H  | 6.24200300  | 0.88235300  | 1.21684600  |
| H  | 4.61688800  | 2.55249300  | -1.54427800 |
| H  | 4.72446100  | -2.07254300 | -0.24072600 |
| O  | 1.38296200  | -2.89099800 | 0.52902000  |
| O  | 2.38647000  | -0.68225500 | 1.76541200  |
| H  | 0.59705800  | -0.44758300 | 1.52058600  |
| H  | 2.86204800  | -0.01988800 | 2.28090700  |
| C  | -3.67357700 | -3.33542500 | -1.37706300 |
| N  | -2.60097500 | -3.87420200 | -0.70971200 |
| C  | -3.52229100 | -1.98607100 | -1.28144800 |
| H  | -2.41159300 | -4.85939800 | -0.59049600 |
| C  | -1.83957800 | -2.87326600 | -0.23854100 |
| N  | -2.37076200 | -1.70604600 | -0.56822300 |
| H  | -4.15553100 | -1.20675200 | -1.67487500 |
| H  | -0.93408800 | -3.02322800 | 0.33022300  |
| C  | -5.31114500 | 1.95479900  | 0.63104700  |
| N  | -5.39853300 | 0.78449900  | 1.34588300  |
| C  | -4.07944600 | 1.93976800  | 0.05183000  |
| H  | -6.18792800 | 0.48889700  | 1.90351000  |
| C  | -4.25675900 | 0.09847400  | 1.18667000  |
| N  | -3.42542700 | 0.77340800  | 0.40825300  |
| H  | -3.62399200 | 2.67747000  | -0.58869200 |
| H  | -4.06380200 | -0.86528200 | 1.63110900  |
| C  | -0.38043400 | 4.11684100  | 0.42634400  |
| N  | 0.38424400  | 3.74022600  | -0.65302400 |
| C  | -1.15219100 | 3.03637800  | 0.72292800  |
| H  | 1.05984000  | 4.31694200  | -1.13336900 |
| C  | 0.07436300  | 2.47612800  | -0.98009300 |
| N  | -0.86393100 | 2.01597000  | -0.16575400 |
| H  | -1.88630000 | 2.92173800  | 1.50360200  |
| H  | 0.55884200  | 1.92545600  | -1.77279100 |
| Fe | -1.63661900 | 0.15564100  | -0.24747800 |
| H  | -0.30642800 | 5.09360200  | 0.87408700  |
| H  | -6.11351000 | 2.67241700  | 0.59678700  |
| H  | -4.42561800 | -3.94382700 | -1.85058600 |
| O  | 0.32590100  | -0.51881400 | -0.35935800 |
| O  | -0.18170500 | -0.66473100 | 0.96074900  |
| H  | 3.99847000  | -1.94207100 | 2.14579200  |
| H  | 0.72551500  | -1.39288600 | -0.55278900 |

23. Cartesian coordinates of TS1 for double hydrogen abstraction from (O3,O4) pair of site of AA by H<sub>2</sub>O<sub>2</sub> in absence of Fe-SOD

|   |             |             |             |
|---|-------------|-------------|-------------|
| C | 0.14259100  | 1.98097900  | -0.16123900 |
| C | 1.17045200  | 0.90132900  | -0.11258500 |
| C | 0.53941300  | -0.28739800 | -0.50706000 |
| C | -0.89507300 | 0.02808800  | -0.82518700 |
| O | -1.03910300 | 1.42999400  | -0.58613200 |
| O | 2.38022400  | 1.14402200  | 0.22699700  |
| O | 0.96542000  | -1.48511700 | -0.59797900 |
| O | 0.25785100  | 3.12957700  | 0.11664600  |
| C | -1.88315200 | -0.73338600 | 0.05845700  |
| C | -3.32225400 | -0.56806300 | -0.41213400 |
| H | -3.44257300 | -0.97592400 | -1.41798800 |
| H | 2.08581600  | -1.66929700 | -0.56157800 |
| H | 2.94942800  | 0.24476400  | 0.58961100  |
| H | -1.09787700 | -0.17182400 | -1.88286600 |
| O | -4.19683200 | -1.28276600 | 0.42560100  |
| O | -1.75951700 | -0.31762900 | 1.40433600  |
| H | -3.93779400 | -1.11349900 | 1.33981200  |
| H | -1.88767000 | 0.63983700  | 1.44774000  |
| H | -1.61405600 | -1.79289700 | 0.04502000  |
| H | -3.57943800 | 0.50079200  | -0.44193200 |
| O | 3.58148600  | -0.75361000 | 0.99186100  |
| O | 3.31360700  | -1.89639500 | -0.50107000 |
| H | 4.52628400  | -0.59453700 | 0.85108000  |
| H | 3.46092800  | -2.74131000 | -0.05248300 |

24. Cartesian coordinates of TS2 for double hydrogen abstraction from (C6,O6) pair of site of AA by H<sub>2</sub>O<sub>2</sub> in absence of Fe-SOD

|   |             |             |             |
|---|-------------|-------------|-------------|
| C | 2.08893200  | -1.05826800 | -0.25335600 |
| C | 2.08466500  | 0.38426100  | 0.02376100  |
| C | 0.99972700  | 0.66197900  | 0.73767500  |
| C | 0.19944400  | -0.59041400 | 0.94380400  |
| O | 0.99824500  | -1.60999400 | 0.32511200  |
| O | 3.05316800  | 1.21400200  | -0.40611900 |
| O | 0.55620800  | 1.85023200  | 1.21618500  |
| O | 2.91892500  | -1.66003000 | -0.87034300 |
| C | -1.18129400 | -0.55541300 | 0.25567300  |
| C | -1.97853600 | -1.85538800 | 0.43348300  |
| H | -2.21502600 | -2.03890600 | 1.48320500  |
| H | 1.19112300  | 2.54603400  | 1.00132300  |
| H | 3.69712900  | 0.69724300  | -0.91142700 |
| H | 0.09423800  | -0.84474300 | 2.00313400  |
| O | -3.18353300 | -1.77262200 | -0.27461400 |
| O | -1.17879900 | -0.11344500 | -0.97928100 |
| H | -2.96361600 | -1.37493900 | -1.12817800 |
| H | -1.37893400 | 1.31223200  | -1.30752300 |
| H | -1.80494800 | 0.25943800  | 0.94399200  |
| H | -1.35126400 | -2.67903100 | 0.06409200  |
| O | -2.08088600 | 1.71852400  | 0.41651900  |
| O | -1.67241100 | 2.32979500  | -1.20612300 |
| H | -1.27643500 | 2.11062400  | 0.81599000  |
| H | -2.55723500 | 2.43979000  | -1.58154100 |

25. Cartesian coordinates of TS3 for double hydrogen abstraction from (C5,C6) pair of site of AA by H<sub>2</sub>O<sub>2</sub> in absence of Fe-SOD

|   |             |             |             |
|---|-------------|-------------|-------------|
| C | -1.99288800 | -0.87793400 | -0.59204100 |
| C | -2.12238300 | 0.37678200  | 0.16064300  |
| C | -0.93476600 | 0.99438700  | 0.10869900  |
| C | 0.02402900  | 0.14469500  | -0.59050100 |
| O | -0.72586100 | -0.97543800 | -1.05720300 |
| O | -3.26986400 | 0.75540300  | 0.75995200  |
| O | -0.49124900 | 2.16241900  | 0.64116400  |
| O | -2.86522000 | -1.68265700 | -0.78136700 |
| C | 1.09866000  | -0.35085000 | 0.43382900  |
| C | 2.00217900  | -1.37518800 | -0.25247200 |
| H | 2.60262000  | -0.95274000 | -1.07061100 |
| H | -1.21391800 | 2.63720700  | 1.06957800  |
| H | -3.92974200 | 0.06432700  | 0.60169100  |
| H | 1.05602900  | 1.07314900  | -1.20581700 |
| O | 2.95386200  | -1.88258300 | 0.65449000  |
| O | 0.48170800  | -1.10882500 | 1.46808300  |
| H | 2.45715200  | -2.28359500 | 1.37770800  |
| H | 0.14049800  | -0.53124200 | 2.15707400  |
| H | 1.90199500  | 0.85594600  | 0.44001000  |
| H | 1.39356700  | -2.18130400 | -0.68194800 |
| O | 2.40000800  | 1.77194000  | 0.12532200  |
| O | 1.91179300  | 1.56315400  | -1.45507900 |
| H | 1.64729700  | 2.33531100  | 0.41290700  |
| H | 2.33410700  | 0.68428000  | -1.55241100 |

26. Cartesian coordinates of TS4 for double hydrogen abstraction from (O6,O7) pair of site of AA by H<sub>2</sub>O<sub>2</sub> in absence of Fe-SOD

|   |             |             |             |
|---|-------------|-------------|-------------|
| C | -2.48002300 | -0.88397600 | -0.21167100 |
| C | -2.43559300 | 0.47040900  | 0.33786800  |
| C | -1.34165000 | 1.07817100  | -0.12551500 |
| C | -0.59500600 | 0.11636200  | -1.01598700 |
| O | -1.38279800 | -1.06882500 | -1.00178700 |
| O | -3.38193000 | 0.95916900  | 1.16476200  |
| O | -0.85495900 | 2.30222100  | 0.07305800  |
| O | -3.31273200 | -1.71943800 | -0.01555100 |
| C | 0.80527200  | -0.14216400 | -0.51487000 |
| C | 1.04892200  | -1.26244300 | 0.28465300  |
| H | 0.22577300  | -1.95403400 | 0.44192300  |
| H | -1.40886700 | 2.78548300  | 0.69950300  |
| H | -4.04773900 | 0.27289300  | 1.31278900  |
| O | 2.17339600  | -1.58391500 | 0.83242900  |
| O | 1.63688900  | 0.77930600  | -0.86468500 |
| H | 2.90550100  | -0.79099300 | 1.04870200  |
| H | 2.70832200  | 0.64645300  | -0.73139700 |
| O | 4.01045300  | 0.52684700  | -0.63970400 |
| H | 4.31402300  | -0.36193900 | -0.87119100 |
| H | -0.52719700 | 0.49751700  | -2.03919900 |
| O | 3.75864300  | 0.14213400  | 1.20946800  |
| H | 4.64295300  | -0.05352900 | 1.54807600  |

27. Cartesian coordinates of TS5 for double hydrogen abstraction from (C6,C7) pair of site of AA by H<sub>2</sub>O<sub>2</sub> in absence of Fe-SOD

|   |             |             |             |
|---|-------------|-------------|-------------|
| C | -2.14264600 | -0.88487600 | -0.55592500 |
| C | -2.30042300 | 0.43706600  | 0.07023800  |
| C | -1.12116600 | 1.04838700  | 0.03129500  |
| C | -0.09846600 | 0.12655300  | -0.55456200 |
| O | -0.86017300 | -1.02192900 | -0.95474800 |
| O | -3.48119000 | 0.88307000  | 0.54178600  |
| O | -0.74701800 | 2.28189900  | 0.44624000  |
| O | -3.00768900 | -1.69855900 | -0.71236200 |
| C | 0.99095500  | -0.26304600 | 0.44699200  |
| C | 1.96129700  | -1.30145300 | -0.15843500 |
| H | 2.66321700  | -0.46442800 | -0.98035600 |
| H | -1.52397100 | 2.76420100  | 0.75718400  |
| H | -4.14454900 | 0.19278700  | 0.39721500  |
| H | 0.35018500  | 0.55969900  | -1.45799700 |
| O | 2.88277900  | -1.70637800 | 0.83459200  |
| O | 0.41846700  | -0.89444100 | 1.58467900  |
| H | 2.36286500  | -1.95365400 | 1.60817200  |
| H | 0.11220400  | -0.23435500 | 2.21468100  |
| H | 1.83271200  | 0.82009900  | 0.52151400  |
| H | 1.38734100  | -2.15317400 | -0.54424000 |
| O | 2.77489200  | 1.64830200  | 0.05193000  |
| O | 3.07685200  | 0.76588100  | -1.27790800 |
| H | 2.31171000  | 2.42461500  | -0.31854300 |
| H | 2.45562900  | 1.00567500  | -1.98891700 |

28. Cartesian coordinates of TS6 for double hydrogen abstraction from (C7,O7) pair of site of AA by H<sub>2</sub>O<sub>2</sub> in absence of Fe-SOD

|   |             |             |             |
|---|-------------|-------------|-------------|
| C | 1.42984800  | 1.06686100  | -0.43755000 |
| C | 2.20732500  | -0.08620700 | 0.00091400  |
| C | 1.47188500  | -1.17888000 | -0.21663000 |
| C | 0.16045800  | -0.77893100 | -0.82480500 |
| O | 0.27424700  | 0.63459200  | -0.99782300 |
| O | 3.42289900  | 0.00850600  | 0.57764900  |
| O | 1.69208500  | -2.46599800 | 0.05537900  |
| O | 1.70618100  | 2.23100100  | -0.30946600 |
| C | -1.01827000 | -1.10494700 | 0.07880600  |
| C | -2.39276300 | -0.72740900 | -0.47233000 |
| H | -2.58607800 | -1.18660600 | -1.45060200 |
| H | 2.52622600  | -2.57345600 | 0.53019800  |
| H | 3.66495000  | 0.94182800  | 0.65000700  |
| H | 0.00800400  | -1.23741900 | -1.80632400 |
| O | -3.35506300 | -0.83247700 | 0.45364200  |
| O | -0.83866300 | -0.48554800 | 1.33091400  |
| H | -3.38495000 | 0.47870600  | 0.04847300  |
| H | -1.69920400 | -0.58471000 | 1.77554800  |
| H | -1.03916000 | -2.19854500 | 0.18988700  |
| H | -0.33135200 | 2.81790700  | 0.43273900  |
| O | -2.55946100 | 0.76802100  | -0.71086000 |
| O | -1.06157700 | 2.32128200  | 0.82310400  |
| H | -1.88467400 | 1.35795600  | -0.26482700 |
| H | -0.66985300 | 1.60638900  | 1.34416300  |

29. Cartesian coordinates of PC1 for double hydrogen abstraction from (O3,O4) pair of site of AA by H<sub>2</sub>O<sub>2</sub> in absence of Fe-SOD

|   |             |             |             |
|---|-------------|-------------|-------------|
| C | 0.99942700  | -0.97987300 | -0.38946300 |
| C | 1.29971900  | 0.48898500  | -0.73642100 |
| C | 0.16340200  | 1.28026200  | -0.08892600 |
| C | -0.74015000 | 0.24838400  | 0.57116800  |
| O | -0.18095000 | -1.04469600 | 0.24788600  |
| O | 2.21055400  | 0.87557400  | -1.39685200 |
| O | 0.00202000  | 2.46031400  | -0.10363600 |
| O | 1.65972800  | -1.93317800 | -0.66127600 |
| C | -2.15924400 | 0.31195100  | 0.02452600  |
| C | -3.13073900 | -0.58668800 | 0.77504400  |
| H | -3.17398500 | -0.30403500 | 1.82894400  |
| H | 2.03195700  | 1.18214200  | 2.30306400  |
| H | 4.19598200  | -0.09119900 | -0.31104700 |
| H | -0.70434000 | 0.36550600  | 1.65614900  |
| O | -4.43063800 | -0.44442700 | 0.25839500  |
| O | -2.15844100 | -0.00952600 | -1.35697600 |
| H | -4.38137200 | -0.47584500 | -0.70480200 |
| H | -1.85433200 | -0.92076200 | -1.46263900 |
| H | -2.50154400 | 1.34846500  | 0.08648200  |
| H | -2.78810100 | -1.63014800 | 0.71584800  |
| O | 4.02575500  | -0.65452300 | 0.45158900  |
| O | 1.88715100  | 0.42311200  | 1.73160900  |
| H | 3.69774900  | -1.48928800 | 0.09572500  |
| H | 2.76205600  | 0.05583600  | 1.49078800  |

30. Cartesian coordinates of PC2 for double hydrogen abstraction from (C6,O6) pair of site of AA by H<sub>2</sub>O<sub>2</sub> in absence of Fe-SOD

|   |             |             |             |
|---|-------------|-------------|-------------|
| C | 2.32507200  | -0.56313700 | -0.32138500 |
| C | 1.63250400  | 0.64927400  | 0.12171700  |
| C | 0.62207400  | 0.29829600  | 0.92717400  |
| C | 0.53058700  | -1.21346300 | 0.87875900  |
| O | 1.69597600  | -1.64824200 | 0.21602900  |
| O | 2.05445100  | 1.87752900  | -0.26013300 |
| O | -0.27969000 | 0.98327500  | 1.61022200  |
| O | 3.30583400  | -0.61930600 | -1.00272600 |
| C | -0.70404000 | -1.53425200 | 0.03194100  |
| C | -2.06837600 | -1.35322100 | 0.67470400  |
| H | -2.07023600 | -0.48212500 | 1.33125900  |
| H | -0.40169300 | 1.88071000  | 1.17593200  |
| H | 2.88014900  | 1.77067400  | -0.75469200 |
| H | 0.47058200  | -1.66586000 | 1.87278900  |
| O | -3.04360900 | -1.16337200 | -0.32568800 |
| O | -0.61854900 | -1.84913300 | -1.12326400 |
| H | -2.78102200 | -1.68478000 | -1.09844800 |
| H | 0.19245900  | 2.97176500  | -0.54717400 |
| H | -2.95720500 | 0.62188600  | -0.78438400 |
| H | -2.28631100 | -2.24207800 | 1.28245400  |
| O | -2.77403800 | 1.56234900  | -0.95449600 |
| O | -0.60597000 | 2.93035800  | -0.00830800 |
| H | -3.61693300 | 2.01269400  | -1.04637300 |
| H | -1.33196000 | 2.52846000  | -0.52191200 |

31. Cartesian coordinates of PC3 for double hydrogen abstraction from (C5,C6) pair of site of AA by H<sub>2</sub>O<sub>2</sub> in absence of Fe-SOD

|   |             |             |             |
|---|-------------|-------------|-------------|
| C | 1.59006000  | 1.43922000  | 0.29915500  |
| C | 2.51417700  | 0.35628100  | -0.02898900 |
| C | 1.81010400  | -0.78593400 | -0.06402200 |
| C | 0.43200000  | -0.47866000 | 0.25344500  |
| O | 0.33587400  | 0.89170200  | 0.46030400  |
| O | 3.82759400  | 0.53736000  | -0.25476800 |
| O | 2.17800800  | -2.05604100 | -0.32410000 |
| O | 1.82382800  | 2.60572800  | 0.40655200  |
| C | -0.62502100 | -1.29429300 | 0.34708500  |
| C | -2.01626200 | -0.85648300 | 0.67801500  |
| H | -2.05953200 | 0.18945800  | 0.97495400  |
| H | 3.12363100  | -2.11410000 | -0.50815000 |
| H | 4.03628600  | 1.47842000  | -0.17245700 |
| H | -2.14301200 | 0.66798100  | -1.44406600 |
| O | -2.85135600 | -0.98804700 | -0.46902200 |
| O | -0.56356700 | -2.62294200 | 0.09591500  |
| H | -2.87897700 | -1.91295000 | -0.73991100 |
| H | 0.32544600  | -2.90181300 | -0.16637900 |
| H | -4.38777500 | 0.60842400  | 0.13164600  |
| H | -2.39481200 | -1.47139600 | 1.50069500  |
| O | -4.14420100 | 1.46110900  | 0.50535300  |
| O | -1.99874600 | 1.61963300  | -1.35683400 |
| H | -3.52675000 | 1.84612500  | -0.13450400 |
| H | -1.18432500 | 1.74104600  | -0.85716900 |

32. Cartesian coordinates of PC4 for double hydrogen abstraction from (O6,O7) pair of site of AA by H<sub>2</sub>O<sub>2</sub> in absence of Fe-SOD

|   |             |             |             |
|---|-------------|-------------|-------------|
| C | 1.27442800  | -1.63902100 | -0.15171800 |
| C | 1.49496200  | -0.21822500 | 0.08820100  |
| C | 0.57805800  | 0.22834900  | 0.96457000  |
| C | -0.37104100 | -0.91756000 | 1.23916800  |
| O | 0.17732800  | -2.04314500 | 0.56965100  |
| O | 2.53658200  | 0.42837600  | -0.48768300 |
| O | 0.35079200  | 1.38836300  | 1.53243800  |
| O | 1.91852300  | -2.37119800 | -0.84279200 |
| C | -1.70543700 | -0.56519400 | 0.59492900  |
| C | -1.97070800 | -1.17870300 | -0.79704400 |
| H | -2.10900600 | -2.27004300 | -0.85779300 |
| H | 0.79399300  | 2.11338300  | 0.99360100  |
| H | 3.05665600  | -0.21785100 | -0.98712700 |
| O | -2.05188200 | -0.47463400 | -1.76582800 |
| O | -2.49614100 | 0.19133800  | 1.07956600  |
| H | -1.56654500 | 1.45165900  | -1.53326500 |
| H | 1.99650700  | 2.48063700  | -0.70421600 |
| O | 1.27080100  | 2.95199700  | -0.27916700 |
| H | 0.47104300  | 2.83099000  | -0.82307400 |
| H | -0.49319600 | -1.12039600 | 2.30482800  |
| O | -1.22470900 | 2.19981000  | -1.02602100 |
| H | -1.80138800 | 2.30649300  | -0.26291300 |

33. Cartesian coordinates of PC5 for double hydrogen abstraction from (C6,C7) pair of site of AA by H<sub>2</sub>O<sub>2</sub> in absence of Fe-SOD

|   |             |             |             |
|---|-------------|-------------|-------------|
| C | 2.66465300  | -0.60489700 | 0.31579000  |
| C | 2.21032900  | 0.76964400  | 0.03934400  |
| C | 0.91832000  | 0.84095200  | 0.33000300  |
| C | 0.43659000  | -0.52276800 | 0.75243000  |
| O | 1.60931800  | -1.34140200 | 0.71407500  |
| O | 3.04832100  | 1.72997900  | -0.38924100 |
| O | 0.02606800  | 1.84291600  | 0.26963700  |
| O | 3.77380900  | -1.02392600 | 0.18632400  |
| C | -0.63879100 | -1.03203000 | -0.15173000 |
| C | -1.85876900 | -1.40415600 | 0.27122300  |
| H | -4.04493900 | 0.17252800  | 1.13852100  |
| H | 0.43940500  | 2.64548900  | -0.08087000 |
| H | 3.93489700  | 1.34915000  | -0.47203100 |
| H | 0.06141500  | -0.50745000 | 1.77331900  |
| O | -2.84875600 | -1.78461400 | -0.55200500 |
| O | -0.42064000 | -1.11834300 | -1.50586100 |
| H | -2.56215100 | -1.74251800 | -1.46710800 |
| H | 0.16563200  | -0.41409100 | -1.81421100 |
| H | -1.94439100 | 0.87523000  | -1.16126900 |
| H | -2.13236700 | -1.45499100 | 1.32831000  |
| O | -2.44277100 | 1.60328000  | -1.54663500 |
| O | -4.04652800 | 1.03741200  | 1.56311400  |
| H | -2.43659500 | 2.27650100  | -0.84982500 |
| H | -3.46547200 | 0.95726800  | 2.34754300  |

34. Cartesian coordinates of PC6 for double hydrogen abstraction from (C7,O7) pair of site of AA by H<sub>2</sub>O<sub>2</sub> in absence of Fe-SOD

|   |             |             |             |
|---|-------------|-------------|-------------|
| C | 0.89791300  | 1.21006800  | -0.44097500 |
| C | 2.05010400  | 0.47972700  | 0.06839800  |
| C | 1.83000400  | -0.81970700 | -0.14079600 |
| C | 0.49771300  | -0.99410400 | -0.79725500 |
| O | 0.01341300  | 0.34152400  | -0.97410700 |
| O | 3.11096400  | 1.07338900  | 0.65229600  |
| O | 2.54714700  | -1.90336900 | 0.16094700  |
| O | 0.72777800  | 2.40495200  | -0.41078800 |
| C | -0.48484100 | -1.77499700 | 0.09838500  |
| C | -1.76729800 | -2.01642500 | -0.68220800 |
| H | -1.62728900 | -2.52449000 | -1.65880600 |
| H | 3.32590600  | -1.65958100 | 0.67774900  |
| H | 2.92974700  | 2.01897800  | 0.74061500  |
| H | 0.59283800  | -1.45846400 | -1.78410300 |
| O | -2.86162300 | -1.70898800 | -0.30584000 |
| O | -0.64622300 | -1.18340200 | 1.32906200  |
| H | -3.22804800 | 0.21381900  | 0.76460000  |
| H | -1.30861300 | -0.44918200 | 1.29447200  |
| H | -0.02863900 | -2.76692000 | 0.24065100  |
| H | -1.06685500 | 2.94611700  | -0.48085300 |
| O | -2.51796400 | 0.71597100  | 1.17636200  |
| O | -2.01397300 | 2.98175100  | -0.27379200 |
| H | -2.39759300 | 1.54114300  | 0.66994900  |
| H | -2.20917000 | 3.85659600  | 0.06931400  |
